# Supplementary material for: Silver triflate–copper(ii) acetate cooperative catalysis in a cascade reaction for concise synthesis of 2-carbonyl H-pyrazolo[5,1-a]isoquinolines
Source: Royal Society of Chemistry journal article supplement (doi:10.1039/c2cc30413a), 2012-01-01

# Silver triflate-copper(II) acetate cooperative catalysis in cascade reaction for concise synthesis of 2-carbonyl *H*-pyrazolo[5,1-*a*]isoquinolines

Zhiyuan Chen,<sup>\*,a</sup> Liang Gao,<sup>a</sup> Shengqing Ye,<sup>b</sup> Qiuping Ding,<sup>a</sup> and Jie Wu<sup>\*,b</sup>

<sup>a</sup> Key Laboratory of Functional Small Organic Molecules, Ministry of Education and College of Chemistry & Chemical Engineering, Jiangxi Normal University, Nanchang, Jiangxi 330022, China

<sup>b</sup> Department of Chemistry, Fudan University, 220 Handan Road, Shanghai 200433, China

jie\_wu@fudan.edu.cn

## Supporting Information

1. General experimental methods (S2).
2. General experimental procedure and characterization data (S2-S9).
3. <sup>1</sup>H and <sup>13</sup>C NMR spectra of compound **3** (S10-S41).

## General experimental methods:

Unless otherwise stated, all commercial reagents were used as received. All solvents were dried and distilled according to standard procedures. Flash column chromatography was performed using silica gel (60-Å pore size, 32–63µm, standard grade). Analytical thin-layer chromatography was performed using glass plates pre-coated with 0.25 mm 230–400 mesh silica gel impregnated with a fluorescent indicator (254 nm). Thin layer chromatography plates were visualized by exposure to ultraviolet light. Organic solutions were concentrated on rotary evaporators at ~20 Torr at 25–35°C. Nuclear magnetic resonance (NMR) spectra are recorded in parts per million from internal tetramethylsilane on the  $\delta$  scale.  $^1\text{H}$  and  $^{13}\text{C}$  NMR spectra were recorded in  $\text{CDCl}_3$  on a Bruker DRX-400 spectrometer operating at 400 MHz and 100 MHz, respectively. All chemical shift values are quoted in ppm and coupling constants quoted in Hz. High resolution mass spectrometry (HRMS) spectra were obtained on a micrOTOF II Instrument.

*General experimental procedure for the reactions of  $N'$ -(2-alkynylbenzylidene)hydrazide **1** with allenolate **2** in the presence of oxygen co-catalyzed by silver triflate and copper(II) acetate.*

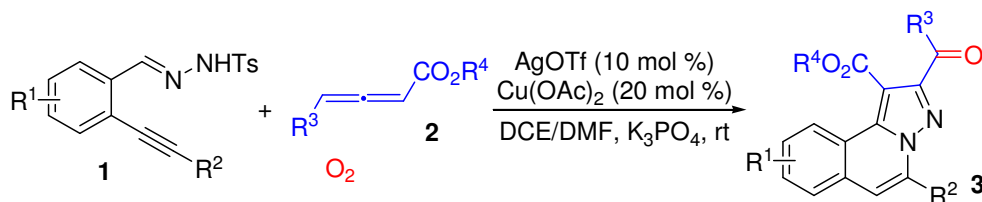

Silver triflate (10 mol %) was added to a solution of  $N'$ -(2-alkynylbenzylidene) hydrazide **1** (0.2 mmol) in DCE (1.0 mL). The solution was stirred at 50 °C in air for one hour. Then copper(II) acetate (20 mol %),  $\text{K}_3\text{PO}_4$  (10 mol %), allenolate **2** (2.0 equiv), and DMF (1.5 mL) were added. The mixture was stirred at room temperature (25 °C) under  $\text{O}_2$  atmosphere overnight. After completion of reaction as indicated by

TLC, the reaction was quenched by saturated aqueous  $\text{NH}_4\text{Cl}$  (5.0 mL). The mixture was extracted with EtOAc (4.0 mL $\times$ 3). The combined organic layer was dried over  $\text{Na}_2\text{SO}_4$ , and concentrated in vacuo. The residue was purified by column chromatography on silica gel to provide the desired product **3**.

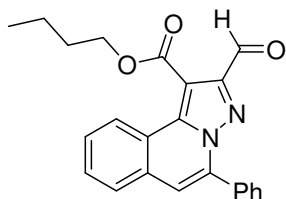

Butyl 2-formyl-5-phenyl*H*-pyrazolo[5,1-*a*]isoquinoline-1-carboxylate (**3a**):  $^1\text{H}$  NMR (400 MHz,  $\text{CDCl}_3$ )  $\delta$  1.00 (t,  $J$  = 6.9 Hz, 3H), 1.47-1.51 (m, 2H), 1.81-1.85 (m, 2H), 4.50-4.52 (m, 2H), 7.30 (s, 1H), 7.53 (d,  $J$  = 8.0 Hz, 3H), 7.65-7.66 (m, 2H), 7.83-7.85 (m, 3H), 8.97 (d,  $J$  = 8.0 Hz, 1H), 10.36 (s, 1H);  $^{13}\text{C}$  NMR (100 MHz,  $\text{CDCl}_3$ )  $\delta$  30.5, 35.4, 44.5, 72.5, 106.9, 113.8, 119.0, 120.7, 122.2, 122.7, 122.9, 126.3, 130.5, 131.6, 139.3, 151.7, 168.4, 169.7; HRMS (ESI) calcd for  $\text{C}_{23}\text{H}_{20}\text{N}_2\text{O}_3$ : 373.1552 ( $\text{M} + \text{H}^+$ ), found: 373.1565.

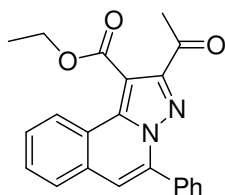

Ethyl 2-acetyl-5-phenyl*H*-pyrazolo[5,1-*a*]isoquinoline-1-carboxylate (**3b**):  $^1\text{H}$  NMR (400 MHz,  $\text{CDCl}_3$ )  $\delta$  1.45 (t,  $J$  = 8.0 Hz, 3H), 2.64 (s, 3H), 4.52-4.57 (m, 2H), 7.24 (s, 1H), 7.52-7.62 (m, 4H), 7.78 (d,  $J$  = 4.0 Hz, 1H), 7.86-7.87 (m, 2H), 8.48 (d,  $J$  = 4.0 Hz, 1H);  $^{13}\text{C}$  NMR (100 MHz,  $\text{CDCl}_3$ )  $\delta$  14.0, 27.6, 62.0, 108.0, 115.9, 123.5, 124.5, 127.6, 128.2, 128.3, 129.3, 129.6, 129.9, 132.8, 138.0, 149.2, 152.4, 165.7, 194.4; HRMS (ESI) calcd for  $\text{C}_{24}\text{H}_{22}\text{N}_2\text{O}_3$ : 381.1215 ( $\text{M} + \text{Na}^+$ ), found: 381.1216.

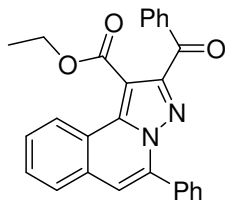

Ethyl 2-benzoyl-5-phenyl*H*-pyrazolo[5,1-*a*]isoquinoline-1-carboxylate (**3c**):  $^1\text{H}$  NMR (400 MHz,  $\text{CDCl}_3$ )  $\delta$  1.00 (t,  $J = 8.0$  Hz, 3H), 4.14-4.17 (m, 2H), 7.32 (s, 1H), 7.44-7.48 (m, 5H), 7.55-7.58 (m, 1H), 7.68-7.69 (m, 2H), 7.82-7.88 (m, 3H), 7.98-8.00 (m, 2H), 9.51 (d,  $J = 8.0$  Hz, 1H);  $^{13}\text{C}$  NMR (100 MHz,  $\text{CDCl}_3$ )  $\delta$  30.8, 69.0, 106.1, 113.0, 118.9, 121.9, 122.7, 123.7, 123.9, 129.6, 130.7, 131.5, 142.1, 151.1, 172.5; HRMS (ESI) calcd for  $\text{C}_{27}\text{H}_{20}\text{N}_2\text{O}_3$ : 443.1372 ( $\text{M} + \text{Na}^+$ ), found: 443.1371.

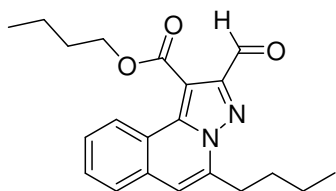

Butyl 5-butyl-2-formyl*H*-pyrazolo[5,1-*a*]isoquinoline-1-carboxylate (**3d**):  $^1\text{H}$  NMR (400 MHz,  $\text{CDCl}_3$ )  $\delta$  1.00-1.49 (m, 10H), 1.79-1.85 (m, 4H), 3.19-3.22 (m, 2H), 4.46-4.49 (m, 2H), 7.07 (s, 1H), 7.58-7.64 (m, 2H), 7.71 (d,  $J = 8.0$  Hz, 1H), 9.07 (d,  $J = 8.0$  Hz, 1H), 10.48 (s, 1H);  $^{13}\text{C}$  NMR (100 MHz,  $\text{CDCl}_3$ )  $\delta$  13.9, 14.1, 19.4, 22.5, 28.9, 30.5, 30.7, 65.8, 108.8, 114.2, 123.3, 126.1, 127.0, 127.5, 129.7, 130.5, 139.2, 139.5, 149.1, 164.4, 187.1; HRMS (ESI) calcd for  $\text{C}_{21}\text{H}_{24}\text{N}_2\text{O}_3$ : 375.1685 ( $\text{M} + \text{Na}^+$ ), found: 375.1696.

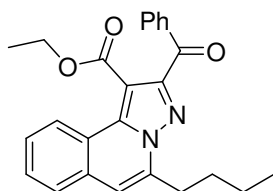

Ethyl 2-benzoyl-5-butyl*H*-pyrazolo[5,1-*a*]isoquinoline-1-carboxylate (**3e**):  $^1\text{H}$  NMR (400 MHz,  $\text{CDCl}_3$ )  $\delta$  0.90-1.01 (m, 6H), 1.45-1.51 (m, 2H), 1.83-1.88 (m, 2H), 3.19-3.22 (m, 2H), 4.12-4.17 (m, 2H), 7.10 (s, 1H), 7.46-7.49 (m, 2H), 7.58-7.68 (m, 3H), 7.76 (d,  $J = 4.0$  Hz, 1H), 8.02 (d,  $J = 8.0$  Hz, 1H);  $^{13}\text{C}$  NMR (100 MHz,  $\text{CDCl}_3$ )

$\delta$  30.8, 31.2, 38.0, 43.2, 44.6, 61.8, 68.9, 77.8, 95.5, 106.0, 118.6, 121.4, 121.8, 123.7, 129.7, 131.1, 131.6, 142.1, 151.1, 159.6, 169.0, 172.9; HRMS (ESI) calcd for  $C_{27}H_{20}N_2O_3$ : 423.1685 ( $M + Na^+$ ), found: 423.1661.

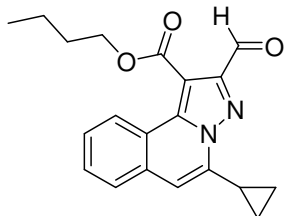

Butyl 5-cyclopropyl-2-formyl*H*-pyrazolo[5,1-*a*]isoquinoline-1-carboxylate (**3f**):  $^1H$  NMR (400 MHz,  $CDCl_3$ )  $\delta$  0.90-0.91 (m, 2H), 0.98 (t,  $J = 8.0$  Hz, 3H), 1.22-1.24 (m, 2H), 1.45-1.51 (m, 2H), 1.79-1.83 (m, 2H), 2.78 (s, 1H), 4.46-4.49 (m, 2H), 6.88 (s, 1H), 7.58-7.67 (m, 3H), 9.09 (d,  $J = 8.0$  Hz, 1H), 10.51 (s, 1H);  $^{13}C$  NMR (100 MHz,  $CDCl_3$ )  $\delta$  7.8, 11.4, 13.9, 19.4, 30.6, 30.7, 65.8, 109.0, 111.3, 123.1, 126.2, 127.0, 127.5, 129.7, 130.6, 139.3, 141.1, 149.2, 164.3, 187.1; HRMS (ESI) calcd for  $C_{20}H_{20}N_2O_3$ : 359.1372 ( $M + Na^+$ ), found: 359.1389.

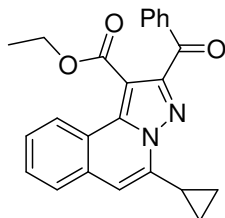

Ethyl 2-benzoyl-5-cyclopropyl*H*-pyrazolo[5,1-*a*]isoquinoline-1-carboxylate (**3g**):  $^1H$  NMR (400 MHz,  $CDCl_3$ )  $\delta$  0.94-1.00 (m, 5H), 1.19-1.21 (m, 2H), 2.74-2.79 (m, 1H), 4.11-4.16 (m, 2H), 6.89 (s, 1H), 7.47-7.50 (m, 2H), 7.59-7.69 (m, 3H), 7.72 (d,  $J = 8.0$  Hz, 1H), 8.03 (d,  $J = 8.0$  Hz, 1H), 9.51 (d,  $J = 8.0$  Hz, 1H);  $^{13}C$  NMR (100 MHz,  $CDCl_3$ )  $\delta$  26.3, 29.2, 30.1, 30.8, 68.9, 103.2, 106.0, 108.1, 110.2, 118.4, 121.4, 121.8, 126.8, 129.7, 132.9, 135.2, 142.3, 151.1, 162.6, 166.0, 173.0; HRMS (ESI) calcd for  $C_{24}H_{20}N_2O_3$ : 407.1372 ( $M + Na^+$ ), found: 407.1364.

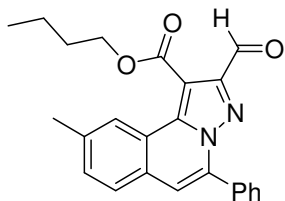

Butyl 2-formyl-9-methyl-5-phenyl*H*-pyrazolo[5,1-*a*]isoquinoline-1-carboxylate (**3h**):  
<sup>1</sup>H NMR (400 MHz, CDCl<sub>3</sub>) δ 0.99 (t, *J* = 8.0 Hz, 3H), 1.46-1.54 (m, 2H), 1.61-1.83 (m, 2H), 2.56 (s, 3H), 4.49-4.52 (m, 2H), 7.25 (s, 1H), 7.46-7.50 (m, 5H), 7.51-7.81 (m, 2H), 8.69 (s, 1H), 10.33 (s, 1H); <sup>13</sup>C NMR (100 MHz, CDCl<sub>3</sub>) δ 13.8, 19.3, 22.1, 30.6, 65.9, 108.3, 116.9, 120.1, 123.7, 125.3, 127.5, 128.1, 128.5, 129.6, 131.4, 137.4, 138.5, 139.0, 149.0, 164.6, 186.6; HRMS (ESI) calcd for C<sub>24</sub>H<sub>22</sub>N<sub>2</sub>O<sub>3</sub>: 409.1528 (M + Na<sup>+</sup>), found: 409.1547.

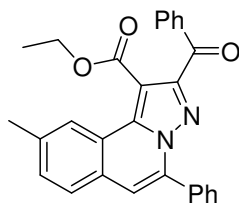

Ethyl 2-benzoyl-9-methyl-5-phenyl*H*-pyrazolo[5,1-*a*]isoquinoline-1-carboxylate (**3i**):  
<sup>1</sup>H NMR (400 MHz, CDCl<sub>3</sub>) δ 1.00 (t, *J* = 4.0 Hz, 3H), 2.61 (s, 3H), 4.15-4.19 (m, 2H), 7.28 (s, 1H), 7.42-7.58 (m, 7H), 7.73 (d, *J* = 8.0 Hz, 1H), 7.87 (d, *J* = 4.0 Hz, 2H), 7.99 (d, *J* = 8.0 Hz, 2H), 9.29 (s, 1H); <sup>13</sup>C NMR (100 MHz, CDCl<sub>3</sub>) δ 13.4, 22.1, 61.1, 116.0, 126.3, 127.2, 128.2, 128.4, 129.4, 129.7, 129.9, 131.4, 133.4, 138.2, 152.4, 163.8, 190.8; HRMS (ESI) calcd for C<sub>28</sub>H<sub>22</sub>N<sub>2</sub>O<sub>3</sub>: 457.1528 (M + Na<sup>+</sup>), found: 457.1522.

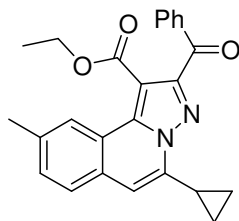

Ethyl 2-benzoyl-5-cyclopropyl-9-methyl*H*-pyrazolo[5,1-*a*]isoquinoline-1-carboxylate (**3j**):  $^1\text{H}$  NMR (400 MHz,  $\text{CDCl}_3$ )  $\delta$  0.89-0.92 (m, 2H), 0.98 (t,  $J$  = 8.0 Hz, 3H), 1.13-1.17 (m, 2H), 2.56 (s, 3H), 2.70-2.73 (m, 2H), 4.10-4.15 (m, 2H), 6.84 (s, 1H), 7.44-7.48 (m, 4H), 7.56-7.60 (m, 2H), 8.02 (d,  $J$  = 8.0 Hz, 2H), 9.26 (s, 1H);  $^{13}\text{C}$  NMR (100 MHz,  $\text{CDCl}_3$ )  $\delta$  26.1, 29.1, 30.8, 31.6, 37.7, 68.8, 105.9, 108.1, 118.4, 121.1, 121.3, 122.8, 124.1, 129.8, 129.9, 132.1, 142.3, 151.1, 172.9; HRMS (ESI) calcd for  $\text{C}_{25}\text{H}_{22}\text{N}_2\text{O}_3$ : 421.1528 ( $\text{M} + \text{Na}^+$ ), found: 421.1512.

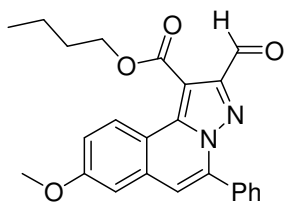

Butyl 2-formyl-8-methoxy-5-phenyl*H*-pyrazolo[5,1-*a*]isoquinoline-1-carboxylate (**3k**):  $^1\text{H}$  NMR (400 MHz,  $\text{CDCl}_3$ )  $\delta$  0.98 (t,  $J$  = 8.0 Hz, 3H), 1.45-1.49 (m, 2H), 1.79-1.82 (m, 2H), 3.94 (s, 3H), 4.45-4.48 (m, 2H), 7.15 (s, 1H), 7.23-7.25 (m, 2H), 7.51 (s, 3H), 7.82 (s, 2H), 9.05 (d,  $J$  = 8.0 Hz, 1H), 10.4 (s, 1H);  $^{13}\text{C}$  NMR (100 MHz,  $\text{CDCl}_3$ )  $\delta$  13.7, 19.3, 30.6, 55.5, 65.6, 108.3, 116.8, 117.7, 117.8, 128.0, 128.4, 129.6, 129.8, 132.5, 138.5, 139.8, 149.3, 160.4, 164.4, 186.8; HRMS (ESI) calcd for  $\text{C}_{24}\text{H}_{22}\text{N}_2\text{O}_4$ : 425.1477 ( $\text{M} + \text{Na}^+$ ), found: 425.1485.

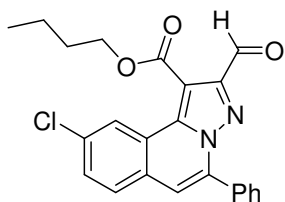

Butyl 9-chloro-2-formyl-5-phenyl*H*-pyrazolo[5,1-*a*]isoquinoline-1-carboxylate (**3l**):  $^1\text{H}$  NMR (400 MHz,  $\text{CDCl}_3$ )  $\delta$  0.99 (t,  $J$  = 8.0 Hz, 3H), 1.48-1.50 (m, 2H), 1.82-1.85 (m, 2H), 4.50-4.53 (m, 2H), 7.27 (s, 1H), 7.52-7.63 (m, 4H), 7.72-7.82 (m, 3H), 9.11 (s, 1H), 10.39 (s, 1H);  $^{13}\text{C}$  NMR (100 MHz,  $\text{CDCl}_3$ )  $\delta$  13.9, 19.4, 30.7, 66.2, 109.0, 116.4, 124.7, 125.7, 128.7, 128.9, 129.0, 129.7, 130.1, 130.5, 132.3, 134.3, 149.4,

164.1, 186.6; HRMS (ESI) calcd for  $C_{23}H_{19}ClN_2O_3$ : 429.0982 ( $M + H^+$ ), found: 429.0989.

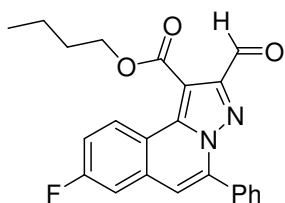

Butyl 8-fluoro-2-formyl-5-phenyl*H*-pyrazolo[5,1-*a*]isoquinoline-1-carboxylate (**3m**):  
 $^1H$  NMR (400 MHz,  $CDCl_3$ )  $\delta$  0.99 (t,  $J = 8.0$  Hz, 3H), 1.44-1.47 (m, 2H), 1.78-1.85 (m, 2H), 4.46-4.49 (m, 2H), 7.23 (s, 1H), 7.33-7.43 (m, 2H), 7.51-7.52 (m, 3H), 7.81-7.82 (m, 2H), 9.13-9.17 (m, 1H), 10.37 (s, 1H);  $^{13}C$  NMR (100 MHz,  $CDCl_3$ )  $\delta$  31.1, 35.5, 44.5, 72.8, 106.5, 109.9, 110.1, 113.0, 116.3, 123.1 ( $^2J_{CF} = 30$  Hz), 123.8, 125.8, 126.2, 131.5, 131.6, 139.5, 139.6, 149.4, 151.4, 151.5, 169.3; HRMS (ESI) calcd for  $C_{23}H_{19}FN_2O_3$ : 413.1277 ( $M + Na^+$ ), found: 413.1295.

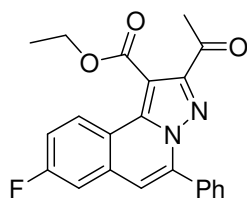

Ethyl 2-acetyl-8-fluoro-5-phenyl*H*-pyrazolo[5,1-*a*]isoquinoline-1-carboxylate (**3n**):  
 $^1H$  NMR (400 MHz,  $CDCl_3$ )  $\delta$  1.43 (t,  $J = 8.0$  Hz, 3H), 2.63 (s, 10H), 4.49-4.54 (m, 2H), 7.17 (s, 1H), 7.30-7.53 (m, 5H), 7.84-7.86 (m, 2H), 8.61-8.65 (m, 1H);  $^{13}C$  NMR (100 MHz,  $CDCl_3$ )  $\delta$  31.3, 69.7, 105.9, 107.6, 109.9, 110.1, 112.0 ( $^2J_{CF} = 30$  Hz), 112.9, 113.5, 113.7, 122.1, 122.8, 123.8, 124.0, 131.4, 140.1, 149.2, 151.2, 152.4, 175.7; HRMS (ESI) calcd for  $C_{22}H_{17}FN_2O_3$ : 399.1121 ( $M + Na^+$ ), found: 399.1103.

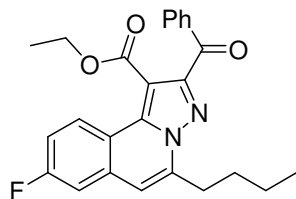



Ethyl 2-benzoyl-5-butyl-8-fluoro-*H*-pyrazolo[5,1-*a*]isoquinoline-1-carboxylate (**3o**):  
<sup>1</sup>H NMR (400 MHz, CDCl<sub>3</sub>) δ 0.94-0.97 (m, 6H), 1.44-1.50 (m, 2H), 1.80-1.86 (m, 2H), 3.17-3.20 (m, 2H), 4.09-4.14 (m, 2H), 7.02 (s, 1H), 7.31-7.34 (m, 2H), 7.36-7.38 (m, 2H), 7.45-7.47 (m, 2H), 7.99 (d, *J* = 8.0 Hz, 2H), 9.62-9.66 (m, 2H); <sup>13</sup>C NMR (100 MHz, CDCl<sub>3</sub>) δ 30.8, 31.2, 38.0, 43.2, 43.8 (<sup>2</sup>*J*<sub>CF</sub> = 30 Hz), 44.6, 69.0, 105.5, 109.0, 110.0, 112.7, 115.9, 122.9, 124.0, 125.3 (<sup>1</sup>*J*<sub>CF</sub> = 240 Hz), 129.7, 131.0, 131.6, 132.6, 142.4, 149.3, 151.1 (<sup>2</sup>*J*<sub>CF</sub> = 40 Hz), 172.8; HRMS (ESI) calcd for C<sub>25</sub>H<sub>23</sub>N<sub>2</sub>O<sub>3</sub>: 441.1590 (M + H<sup>+</sup>), found: 441.1609.

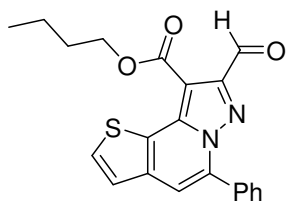

Compound **3p**: <sup>1</sup>H NMR (400 MHz, CDCl<sub>3</sub>) δ 0.99 (t, *J* = 8.0 Hz, 3H), 1.47-1.51 (m, 2H), 1.83-1.86 (m, 2H), 4.48-4.51 (m, 2H), 7.47-7.51 (m, 5H), 7.79-7.84 (m, 3H), 10.70 (s, 1H); <sup>13</sup>C NMR (100 MHz, CDCl<sub>3</sub>) δ 31.1, 35.6, 44.7, 72.2, 97.4, 110.5, 113.2, 119.2, 122.1, 123.8, 130.5, 130.8, 139.3, 150.6, 169.7, 187.9; HRMS (ESI) calcd for C<sub>21</sub>H<sub>18</sub>N<sub>2</sub>O<sub>3</sub>S: 401.0936 (M + Na<sup>+</sup>), found: 401.0951.

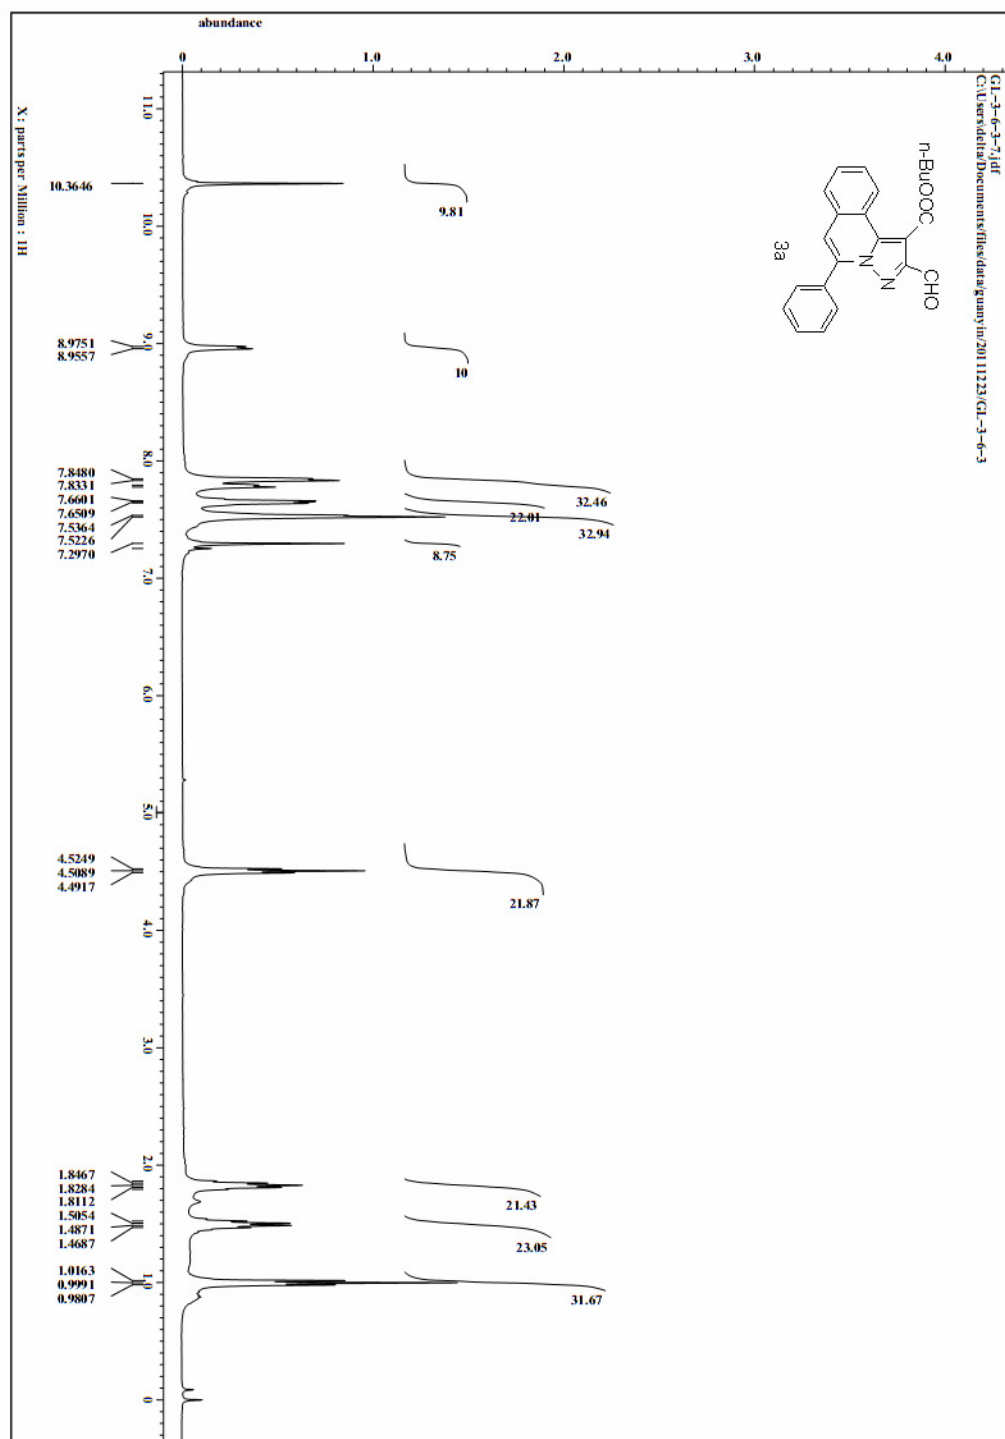

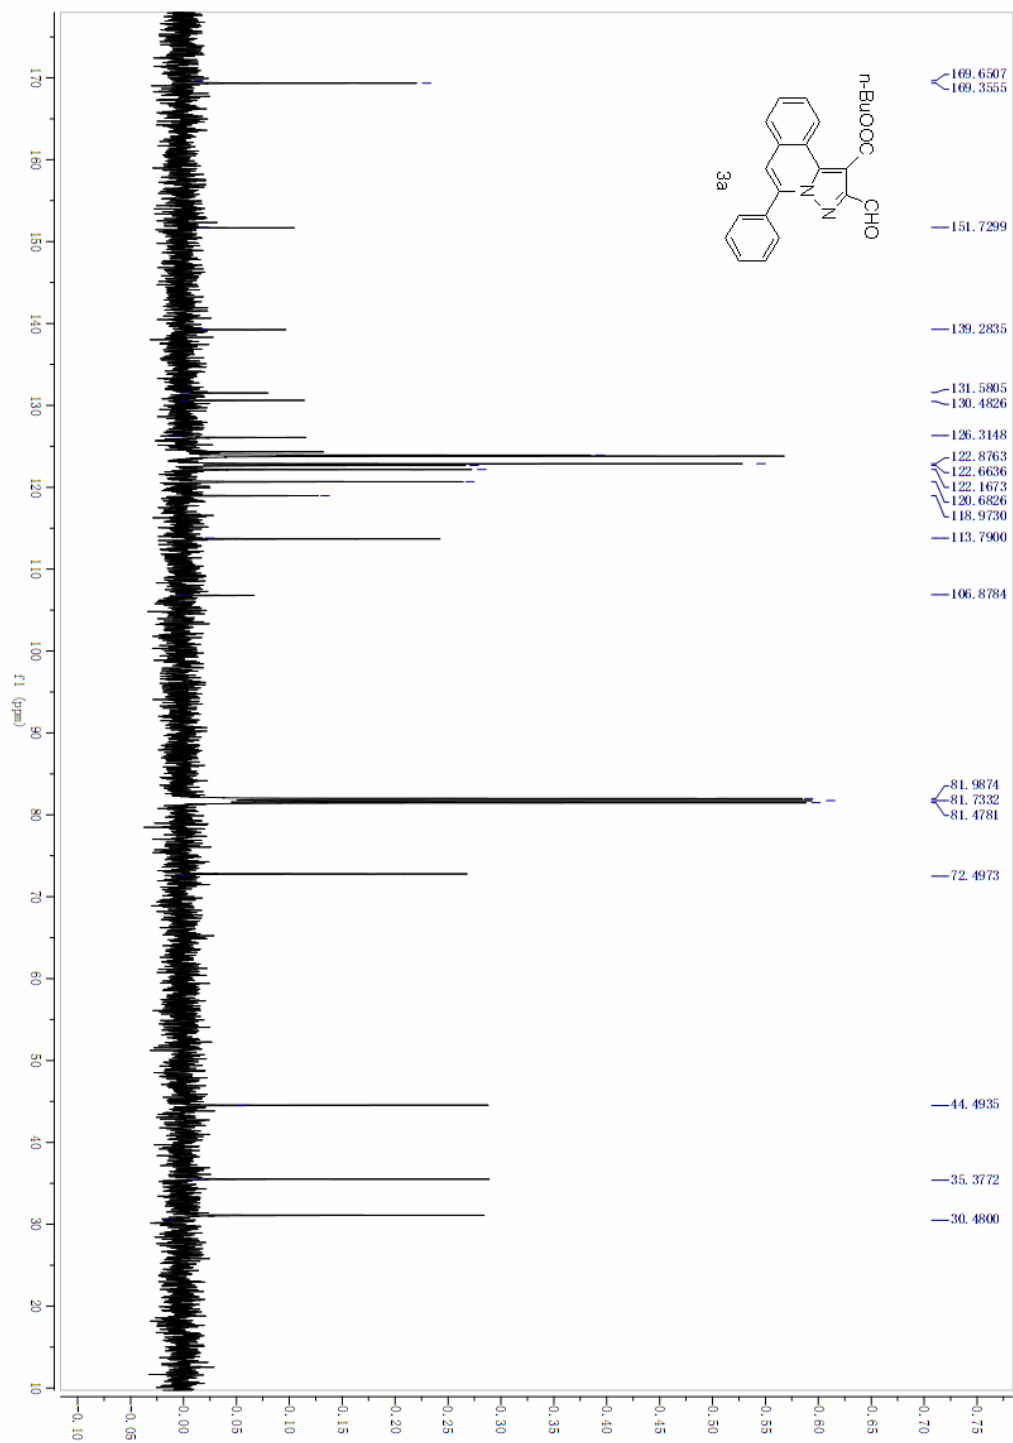

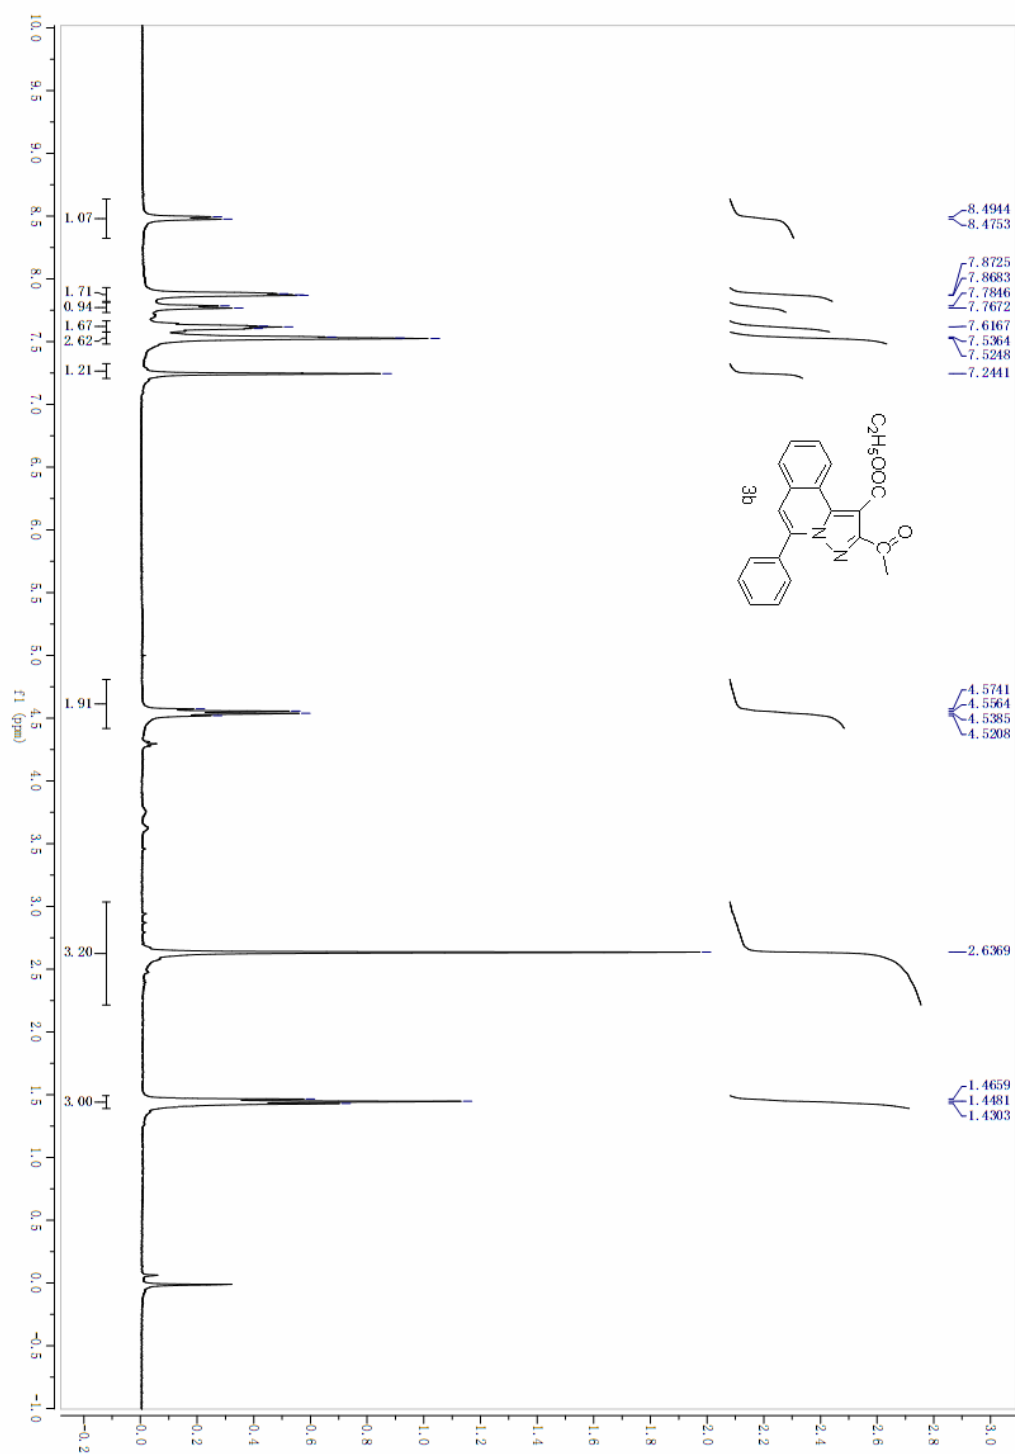

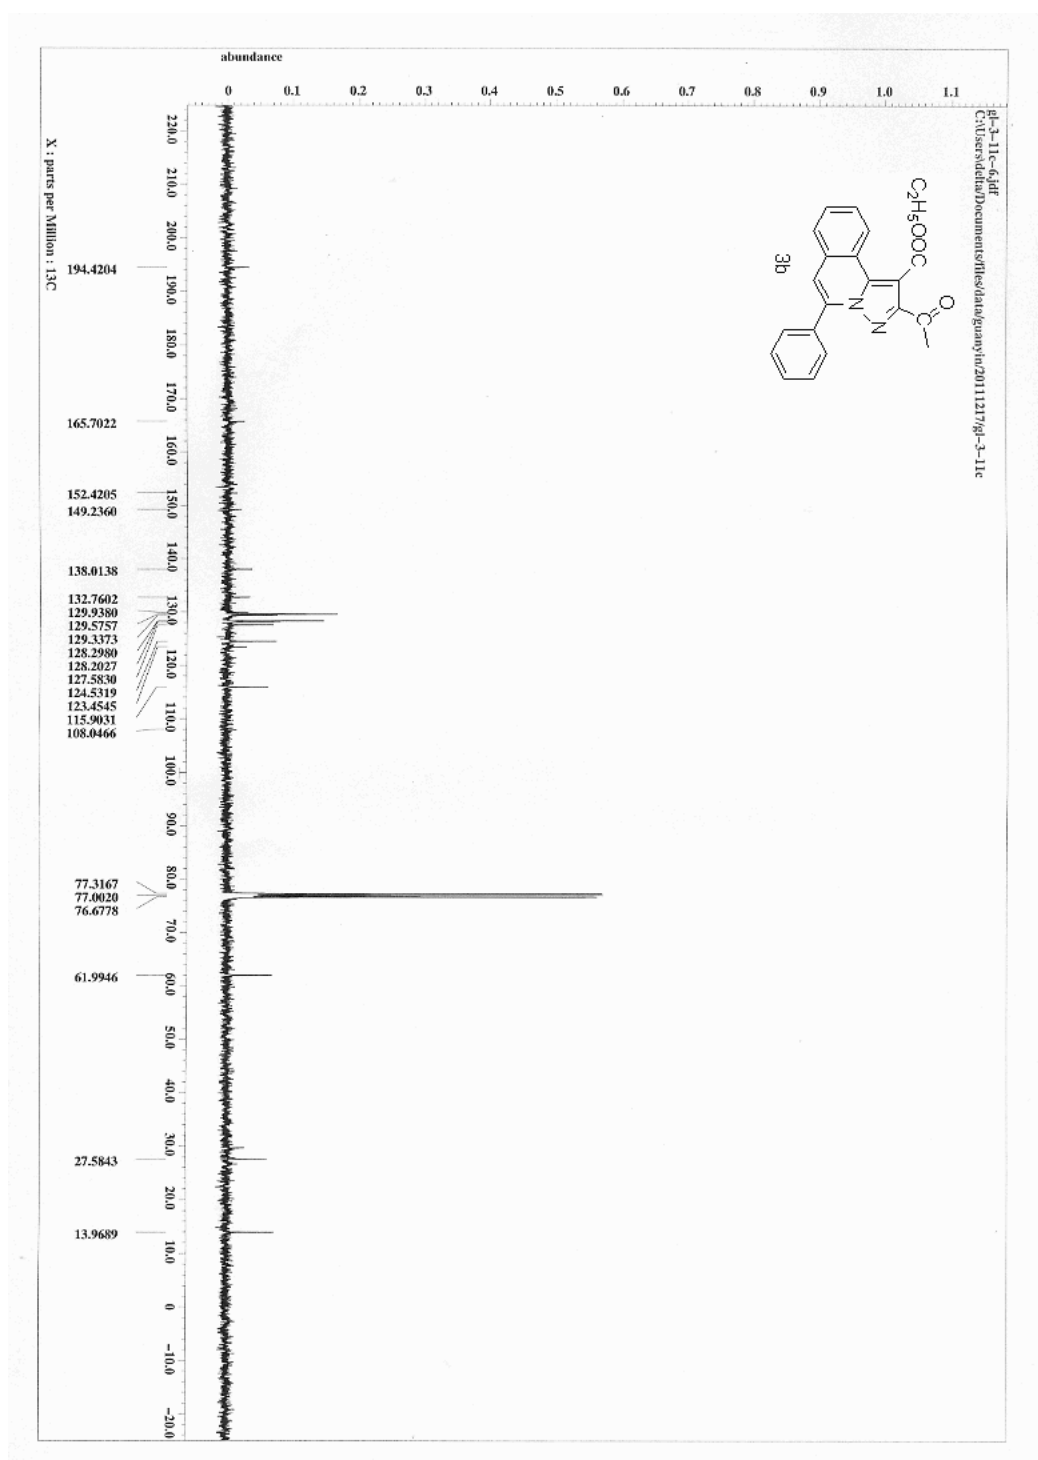

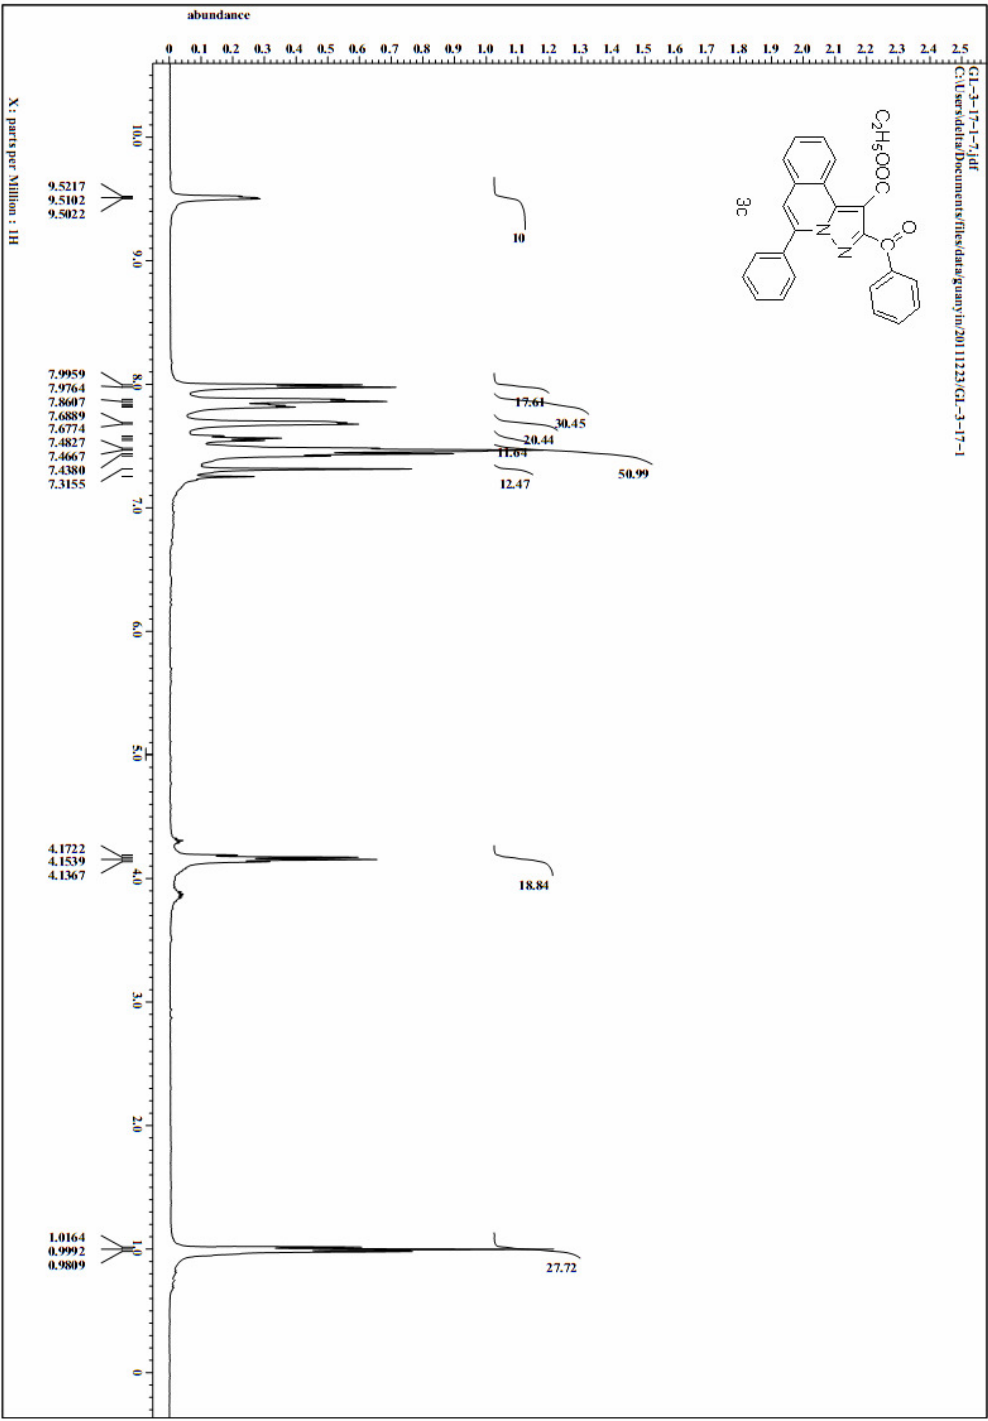

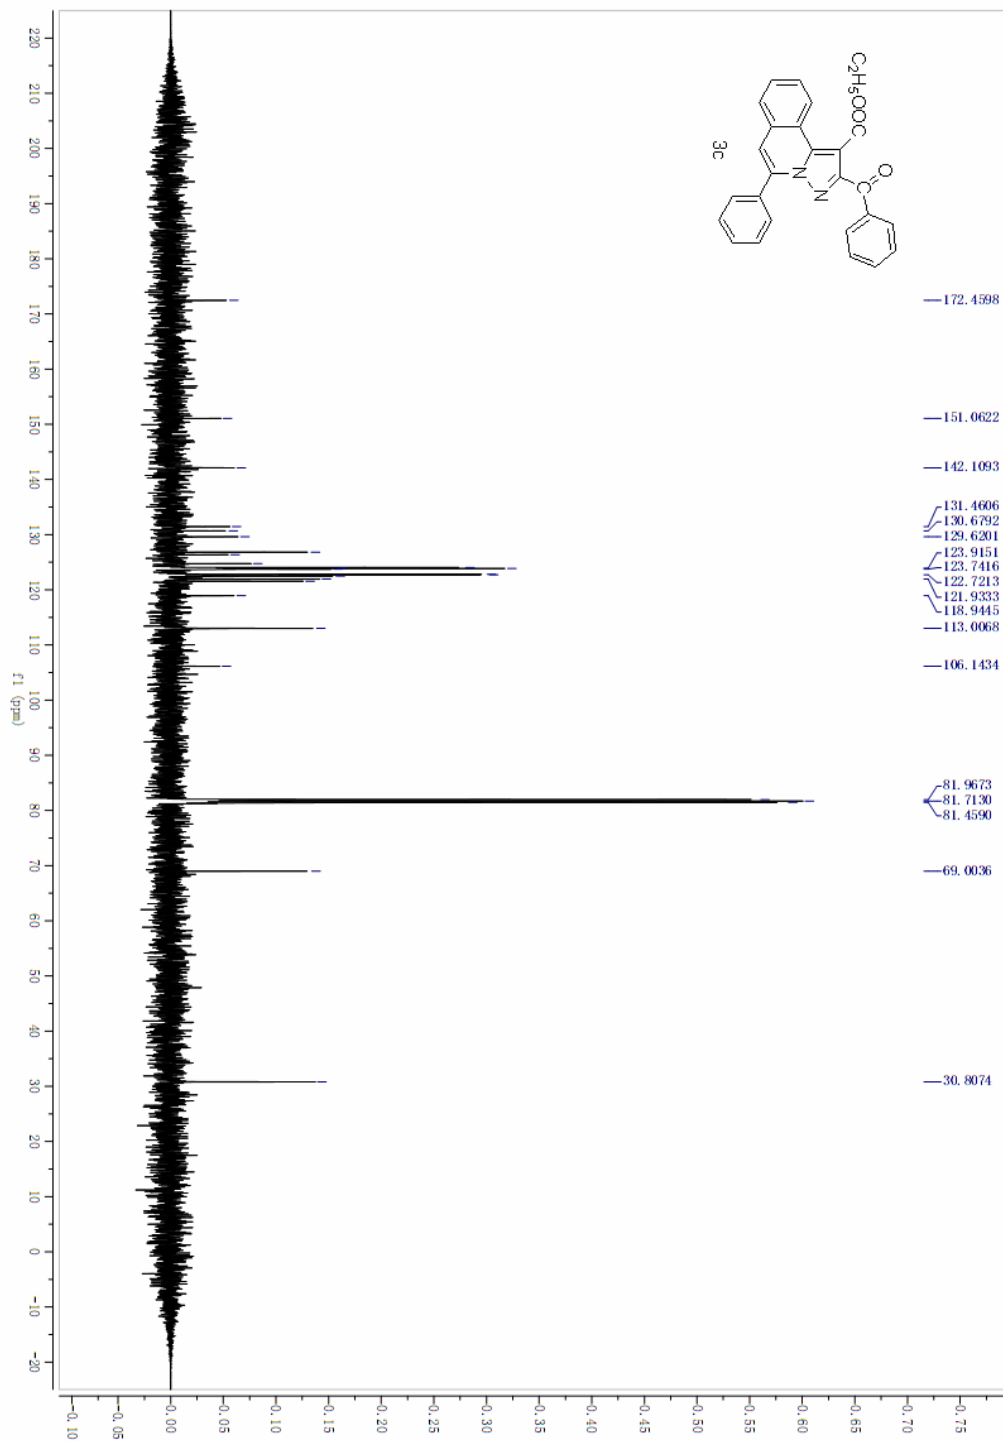

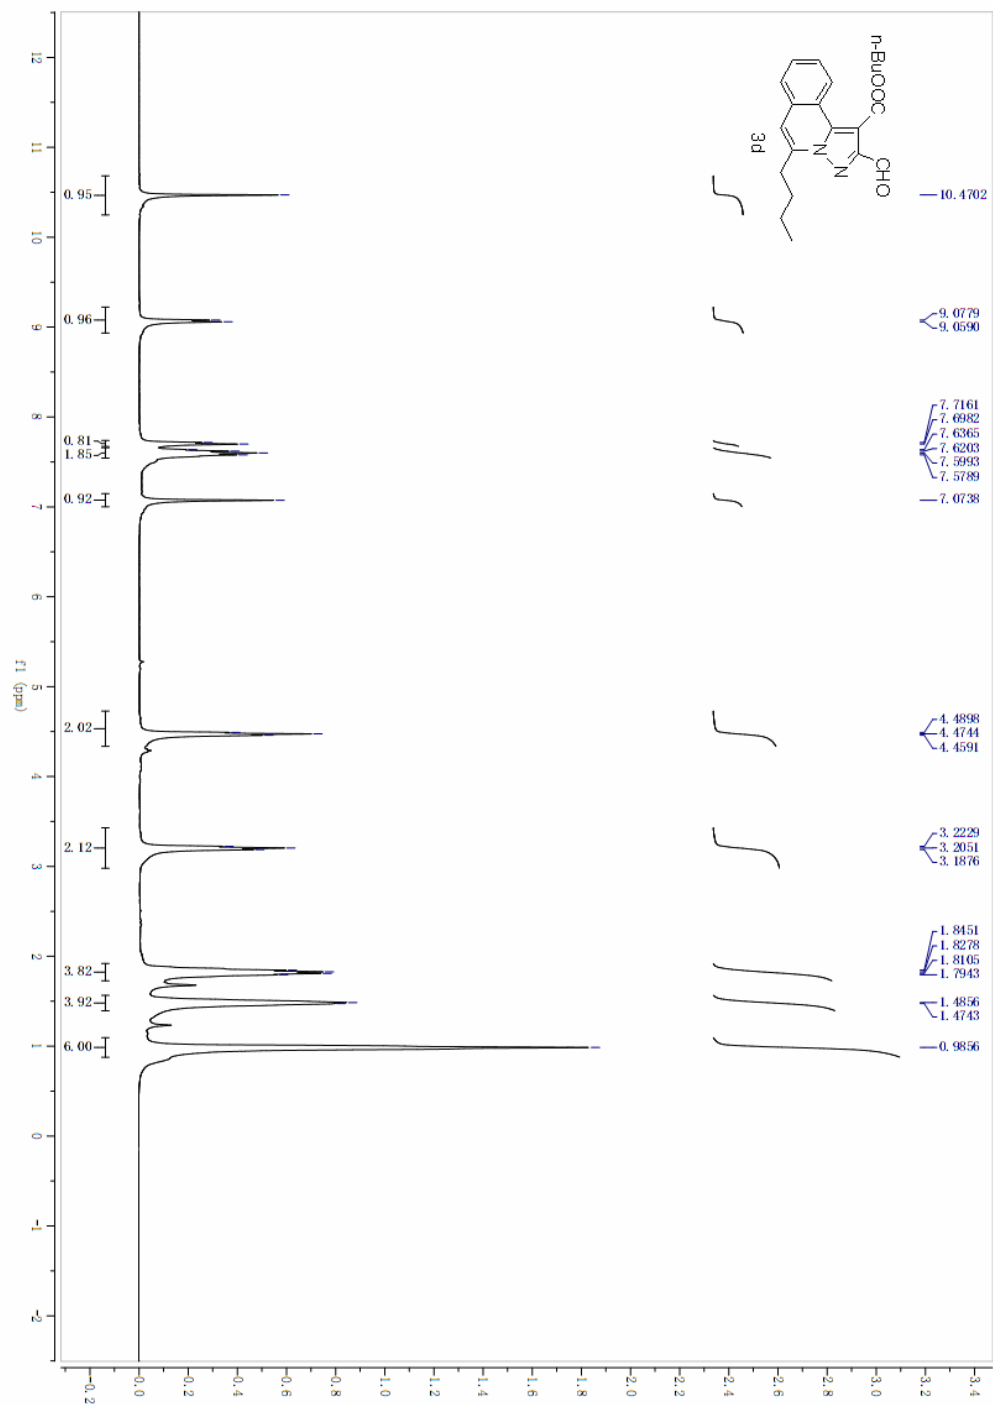



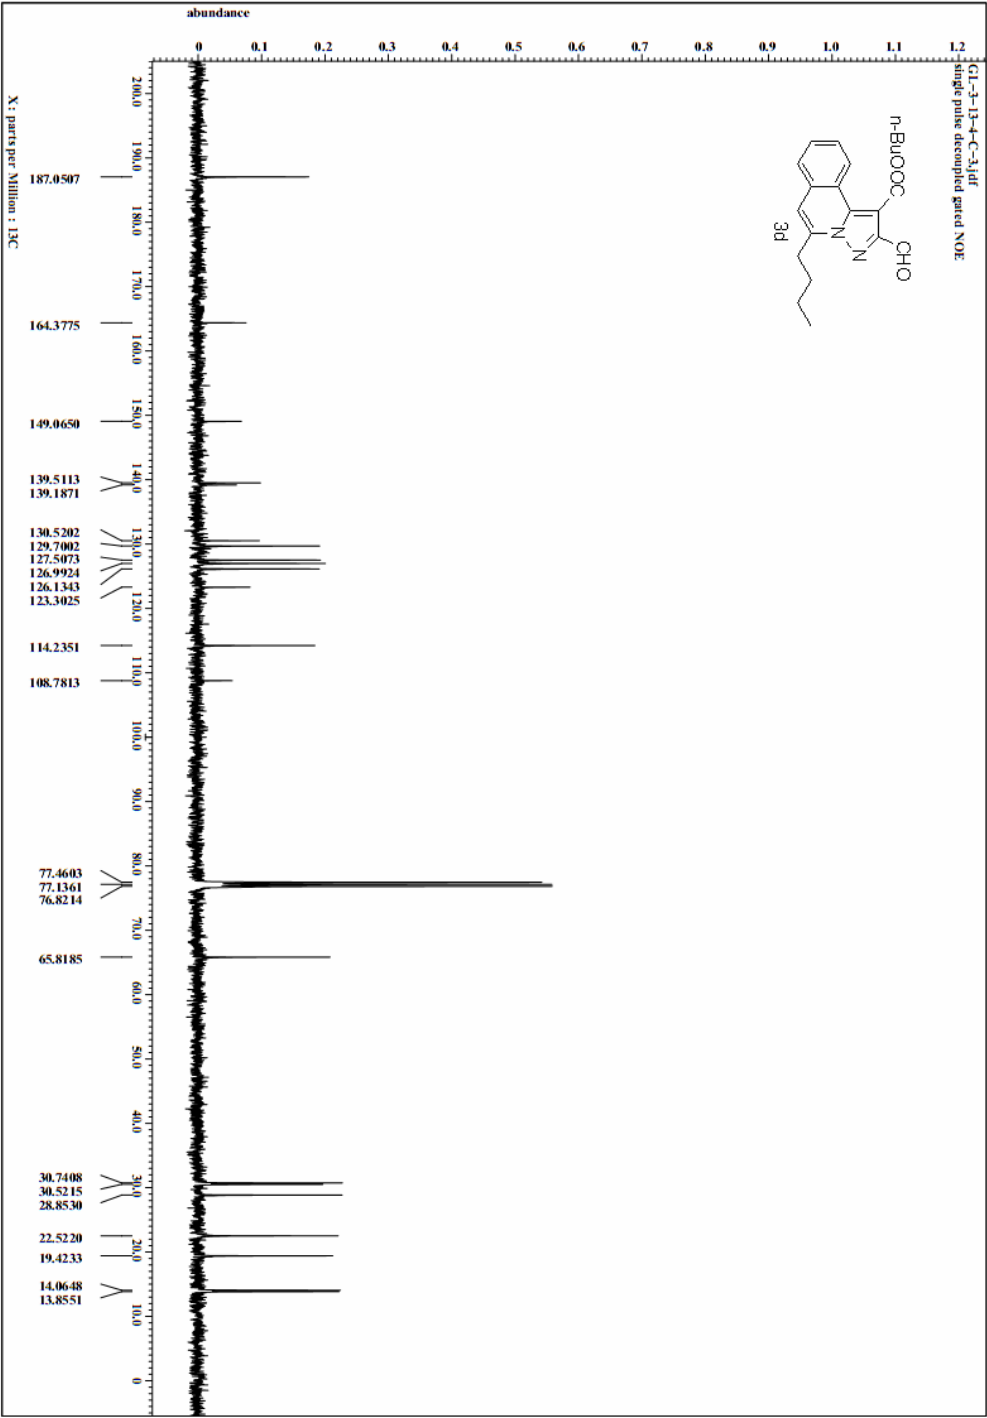

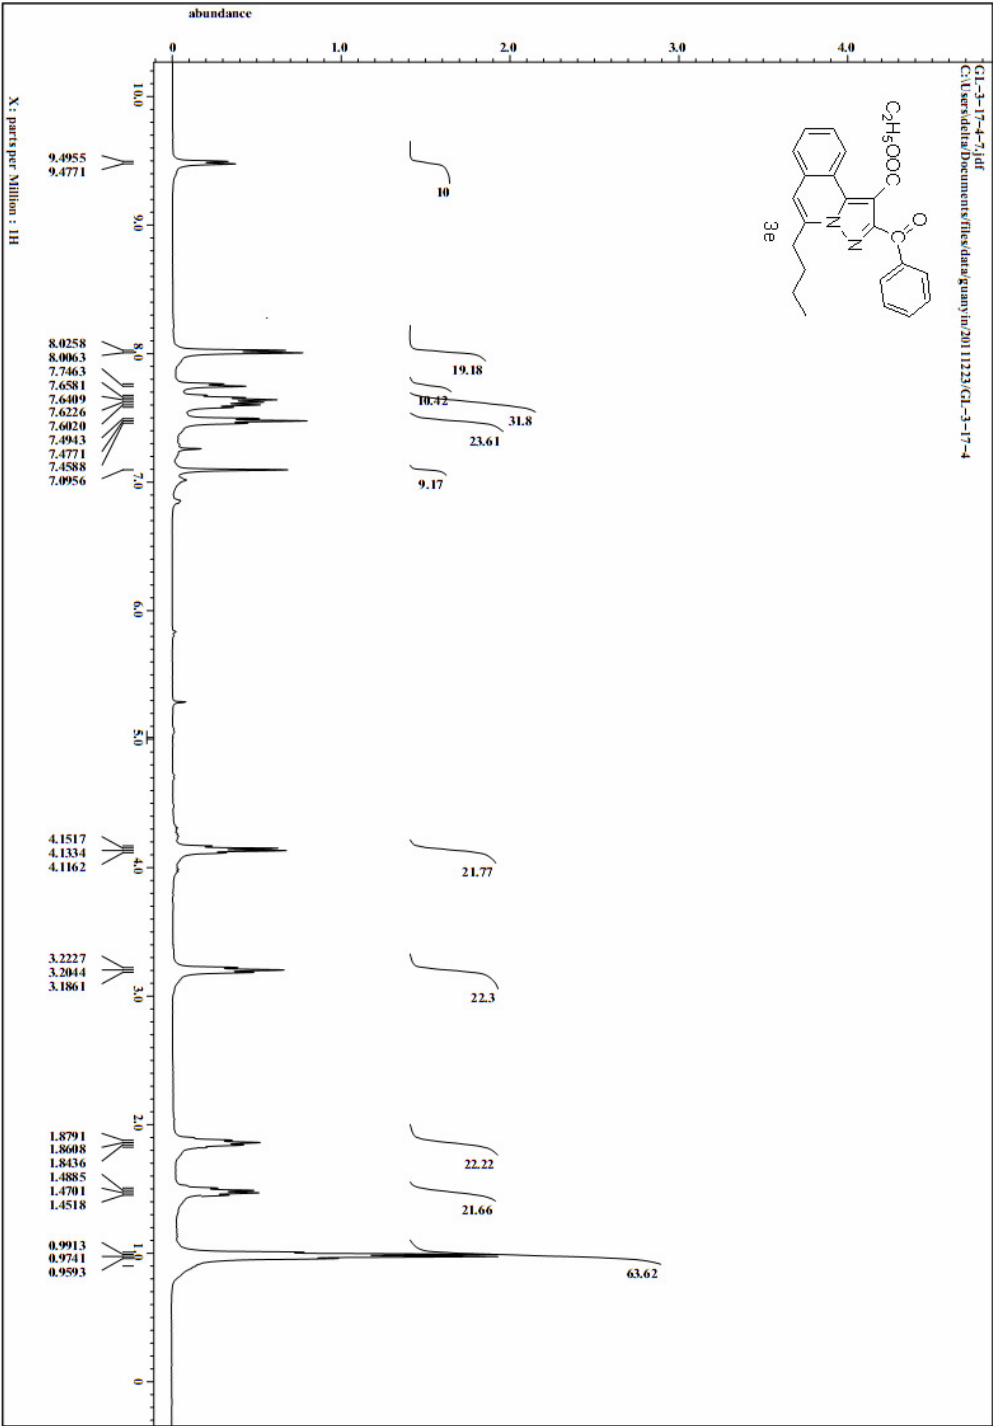

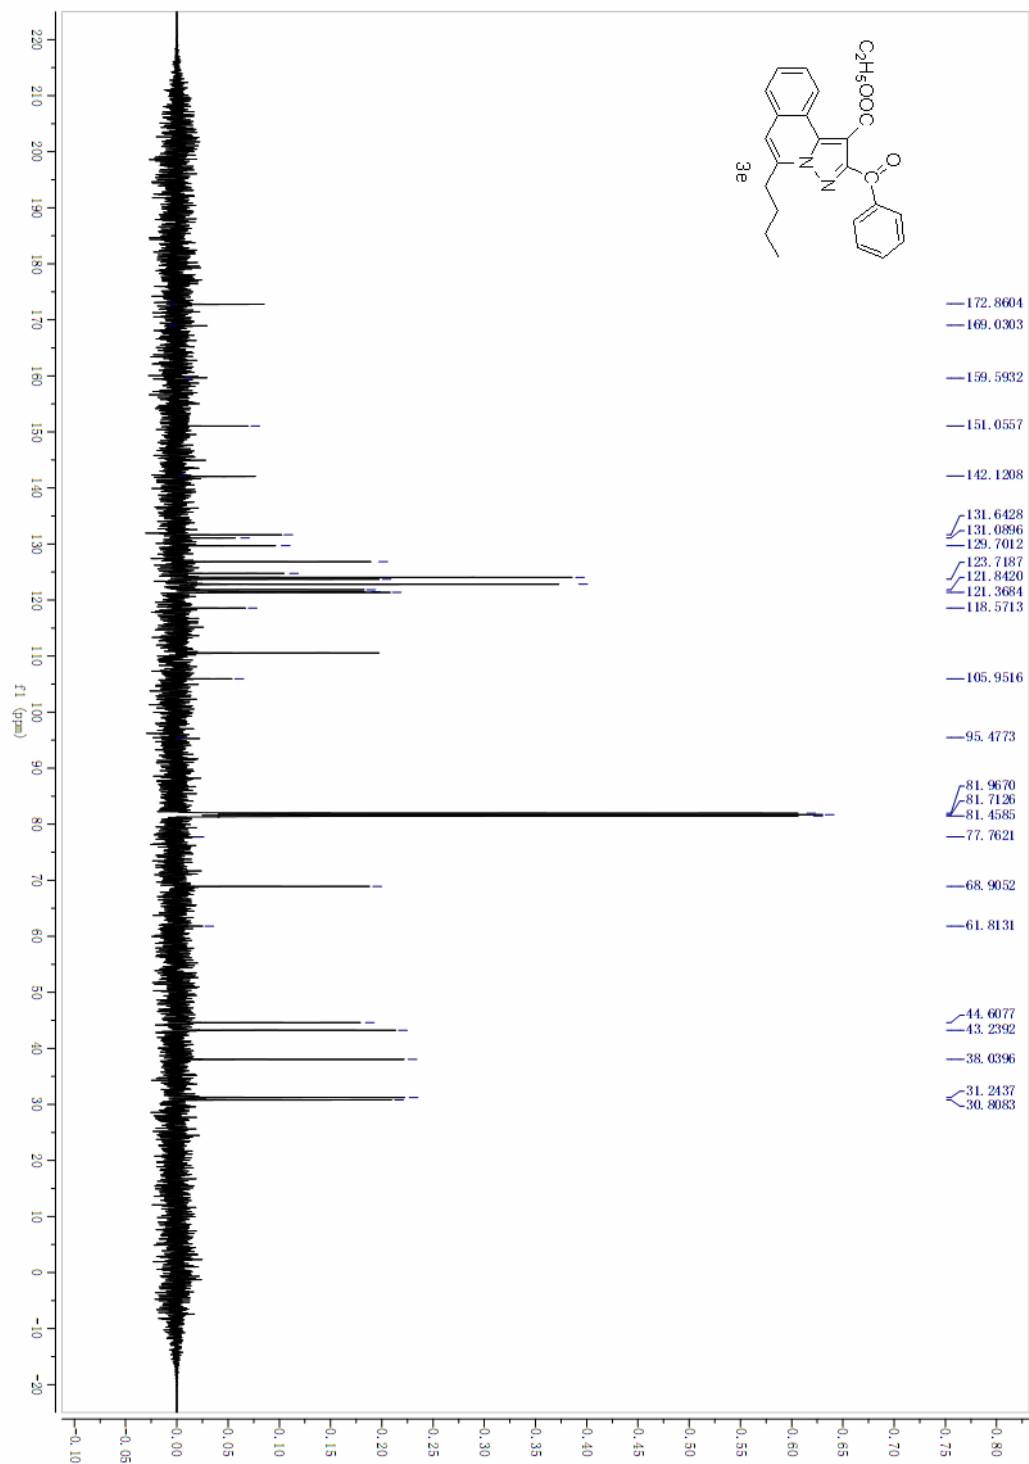

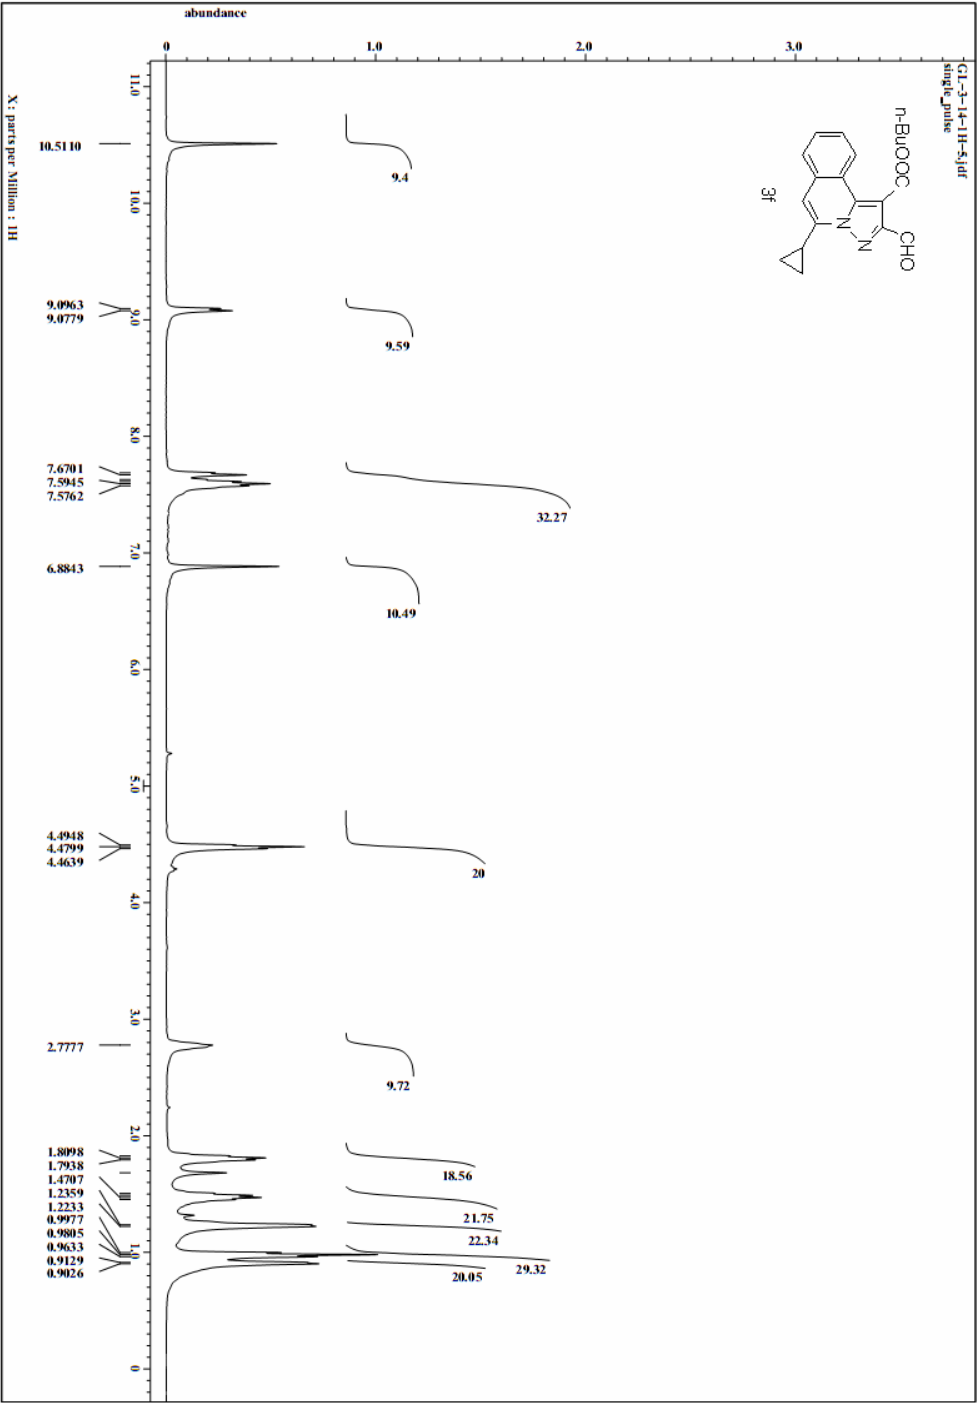

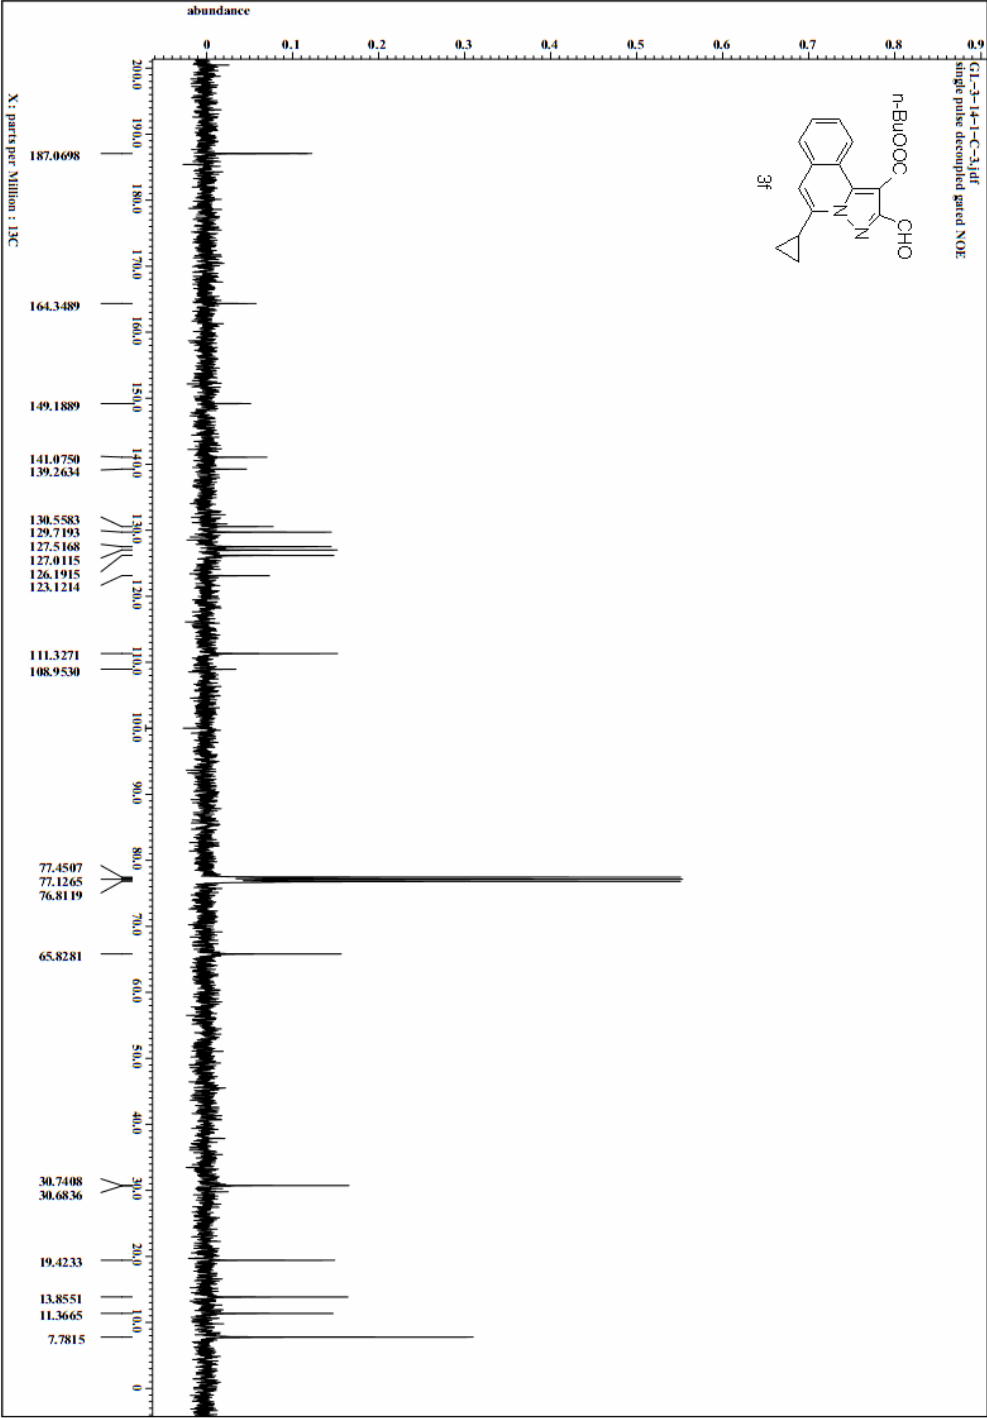

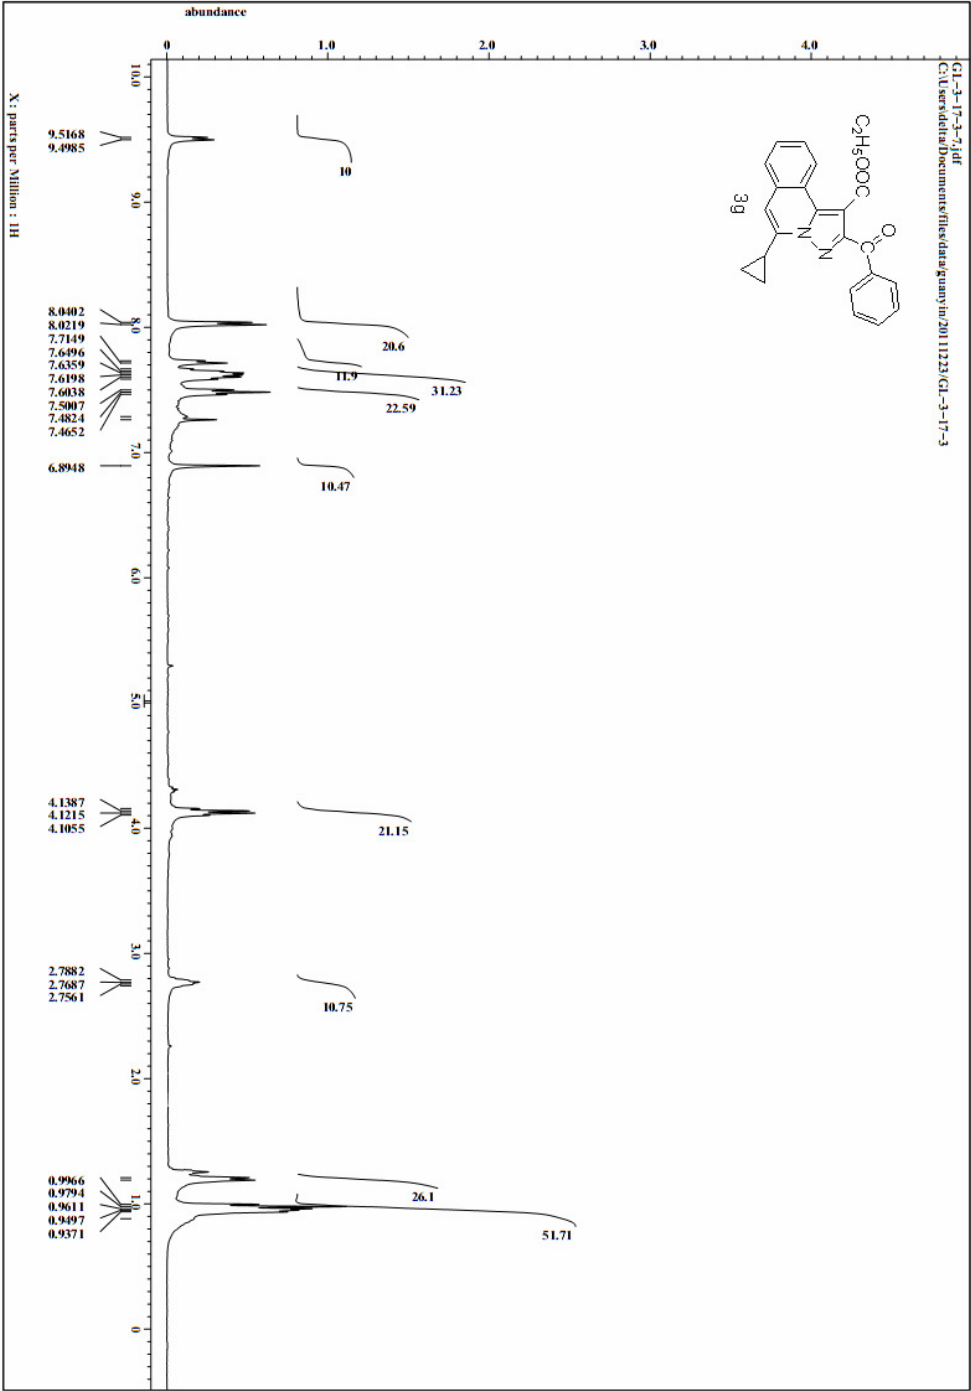

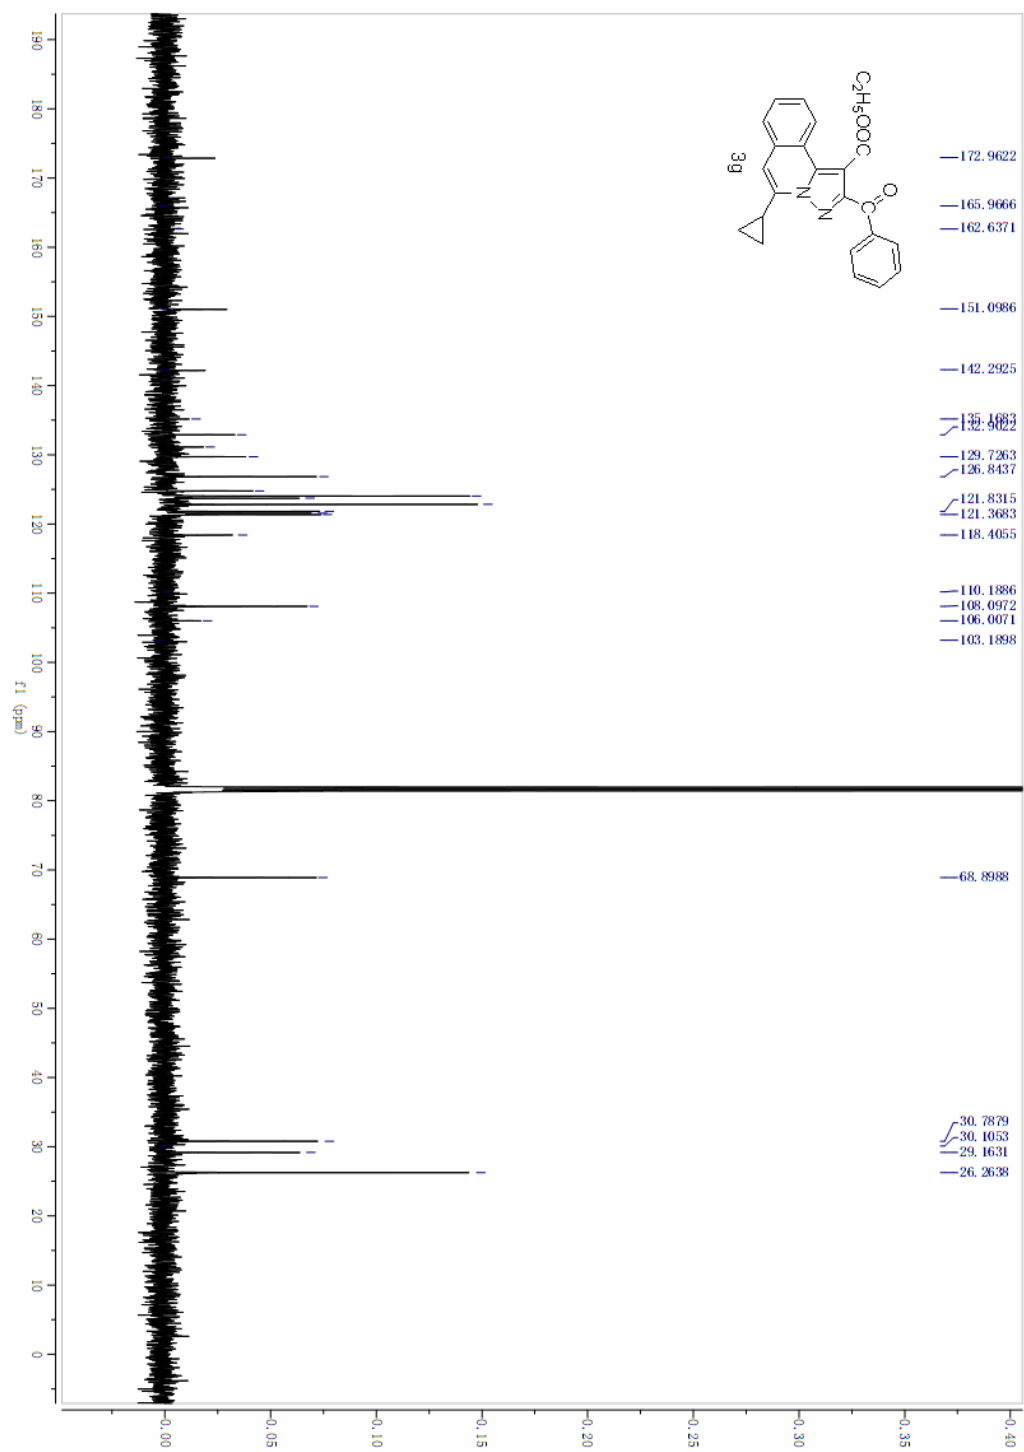

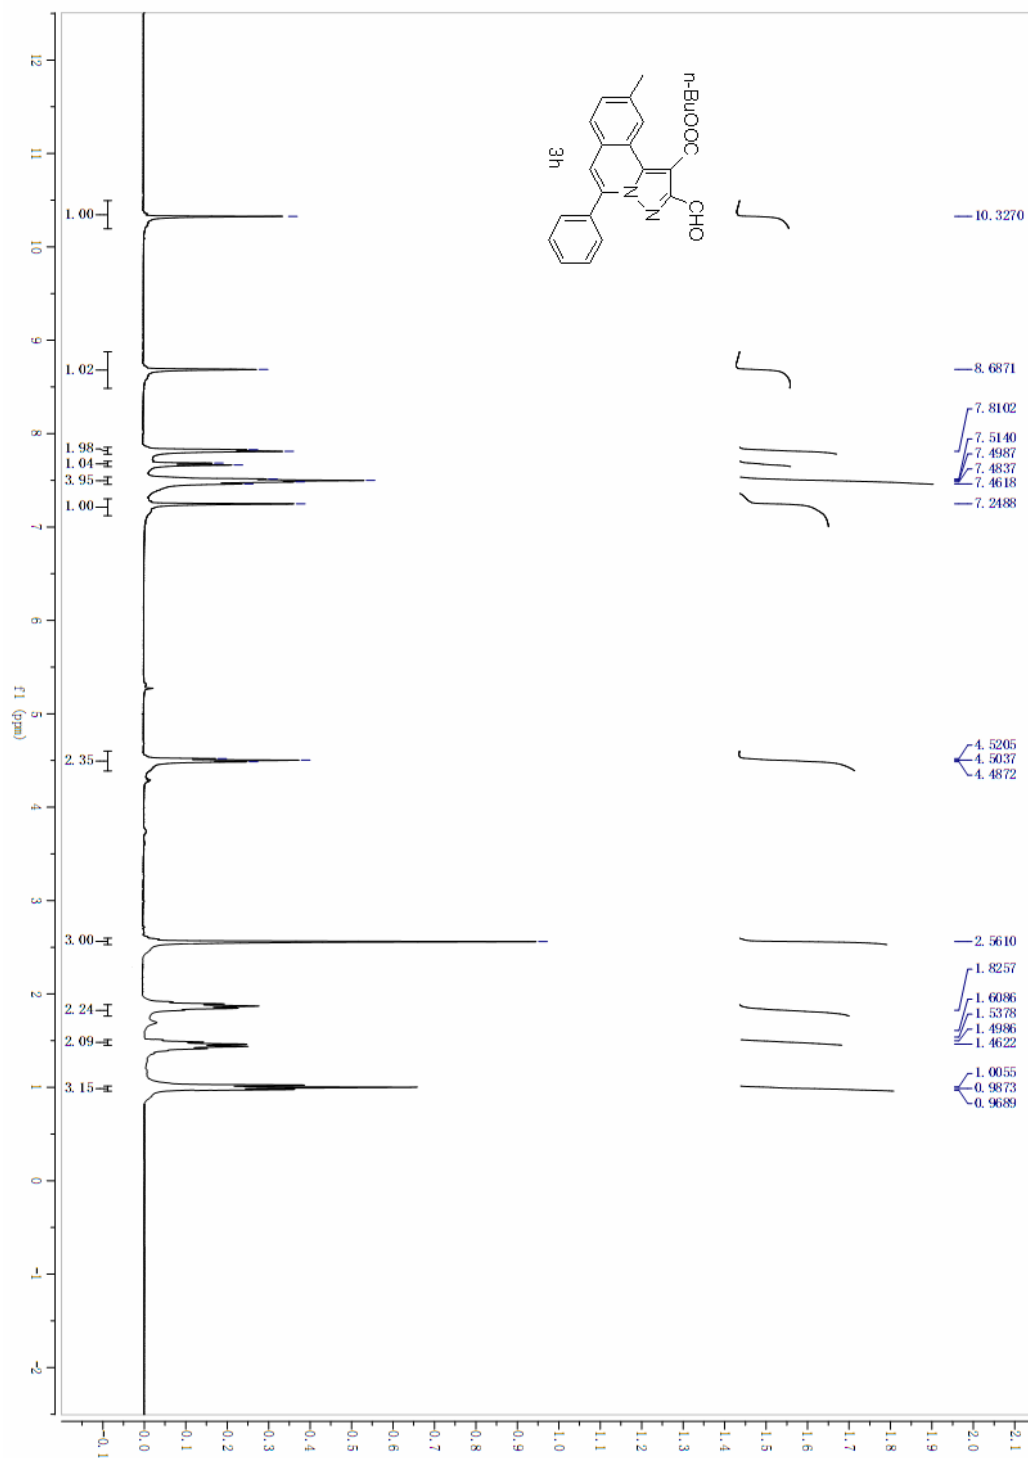



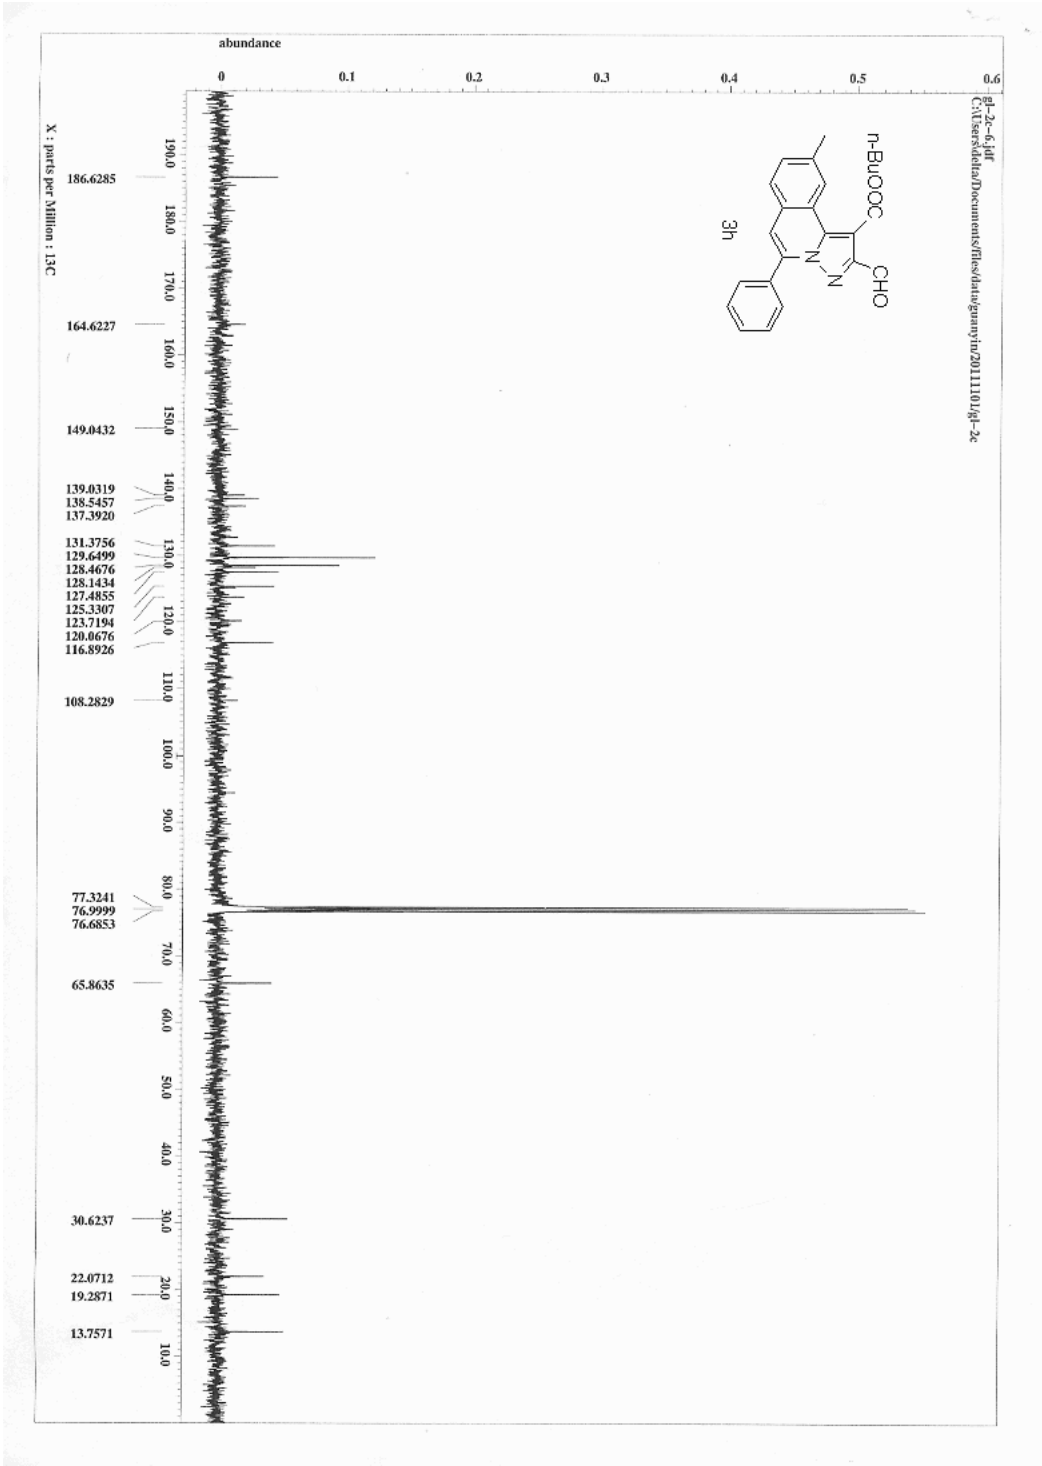

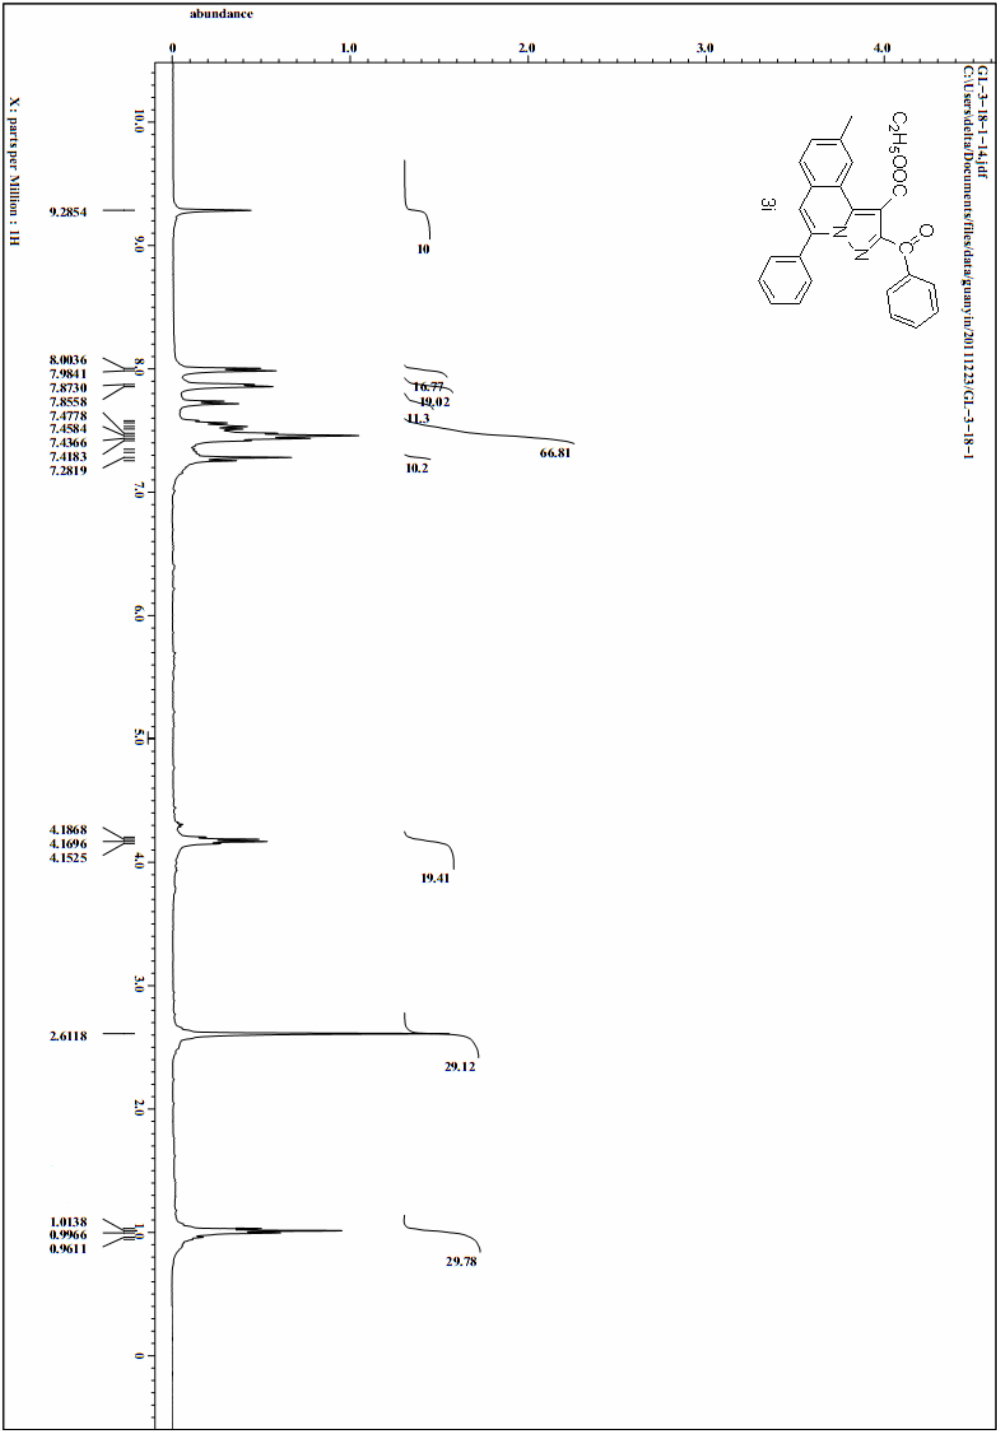

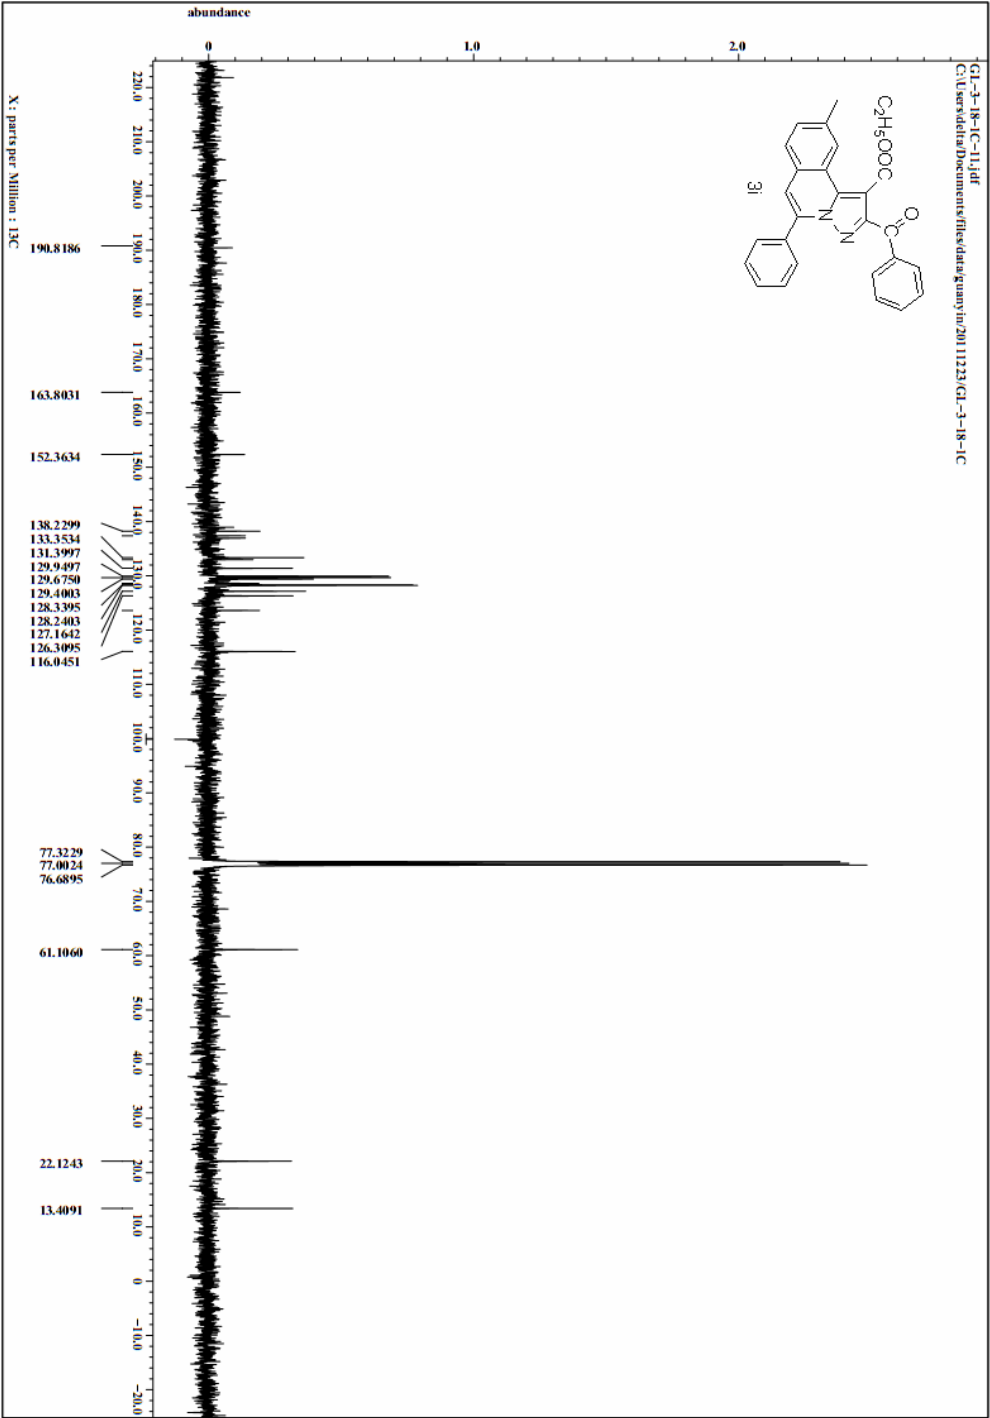

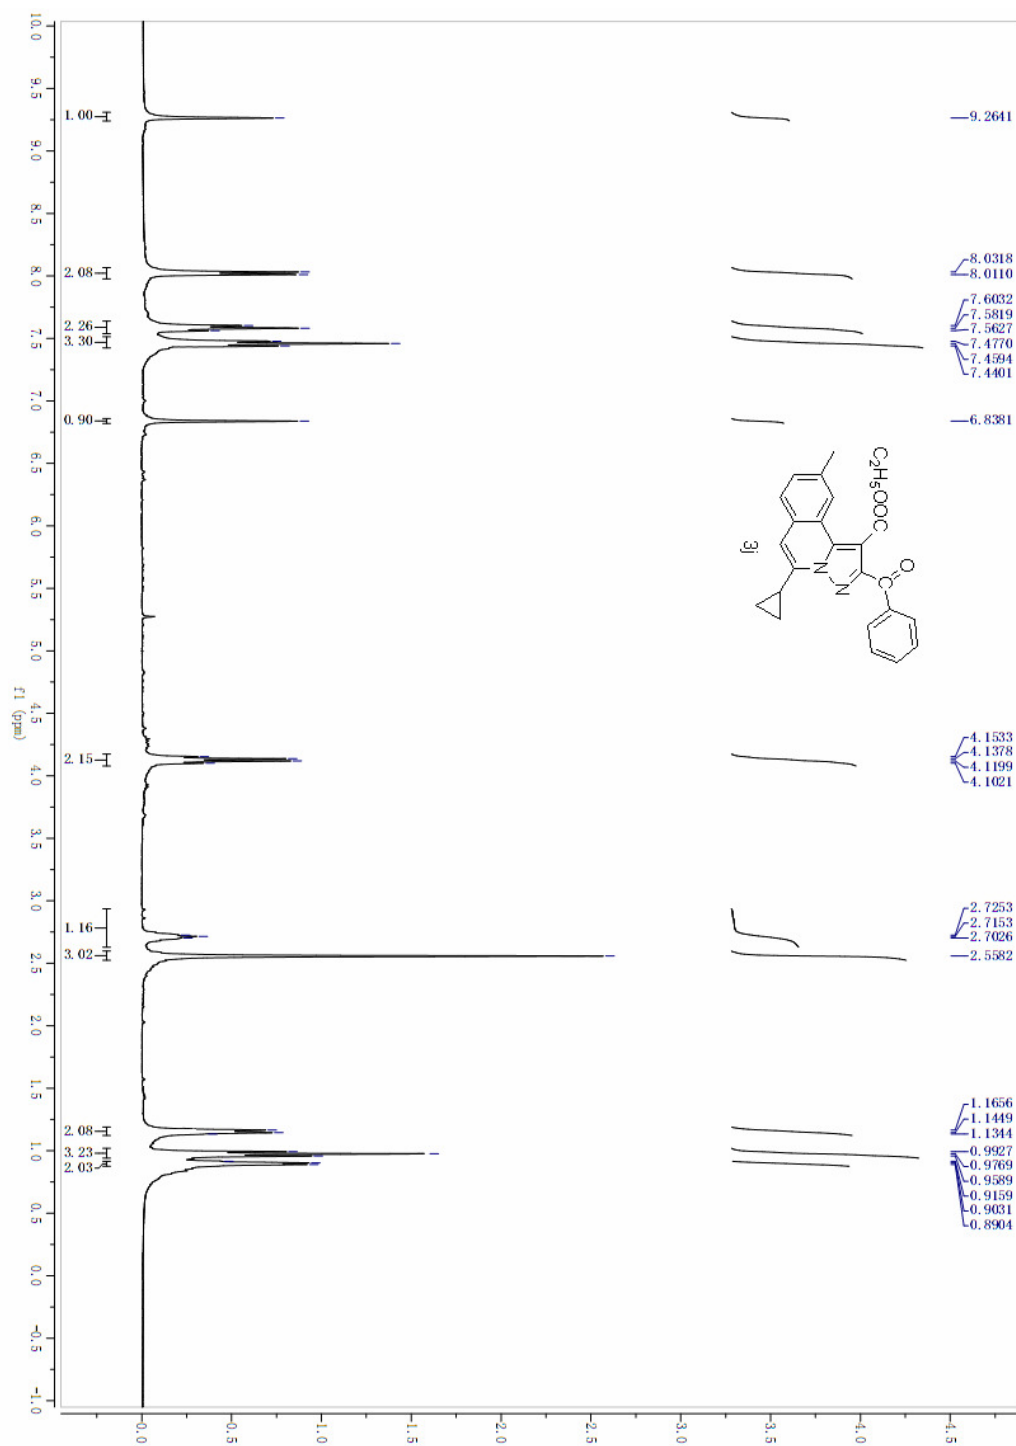

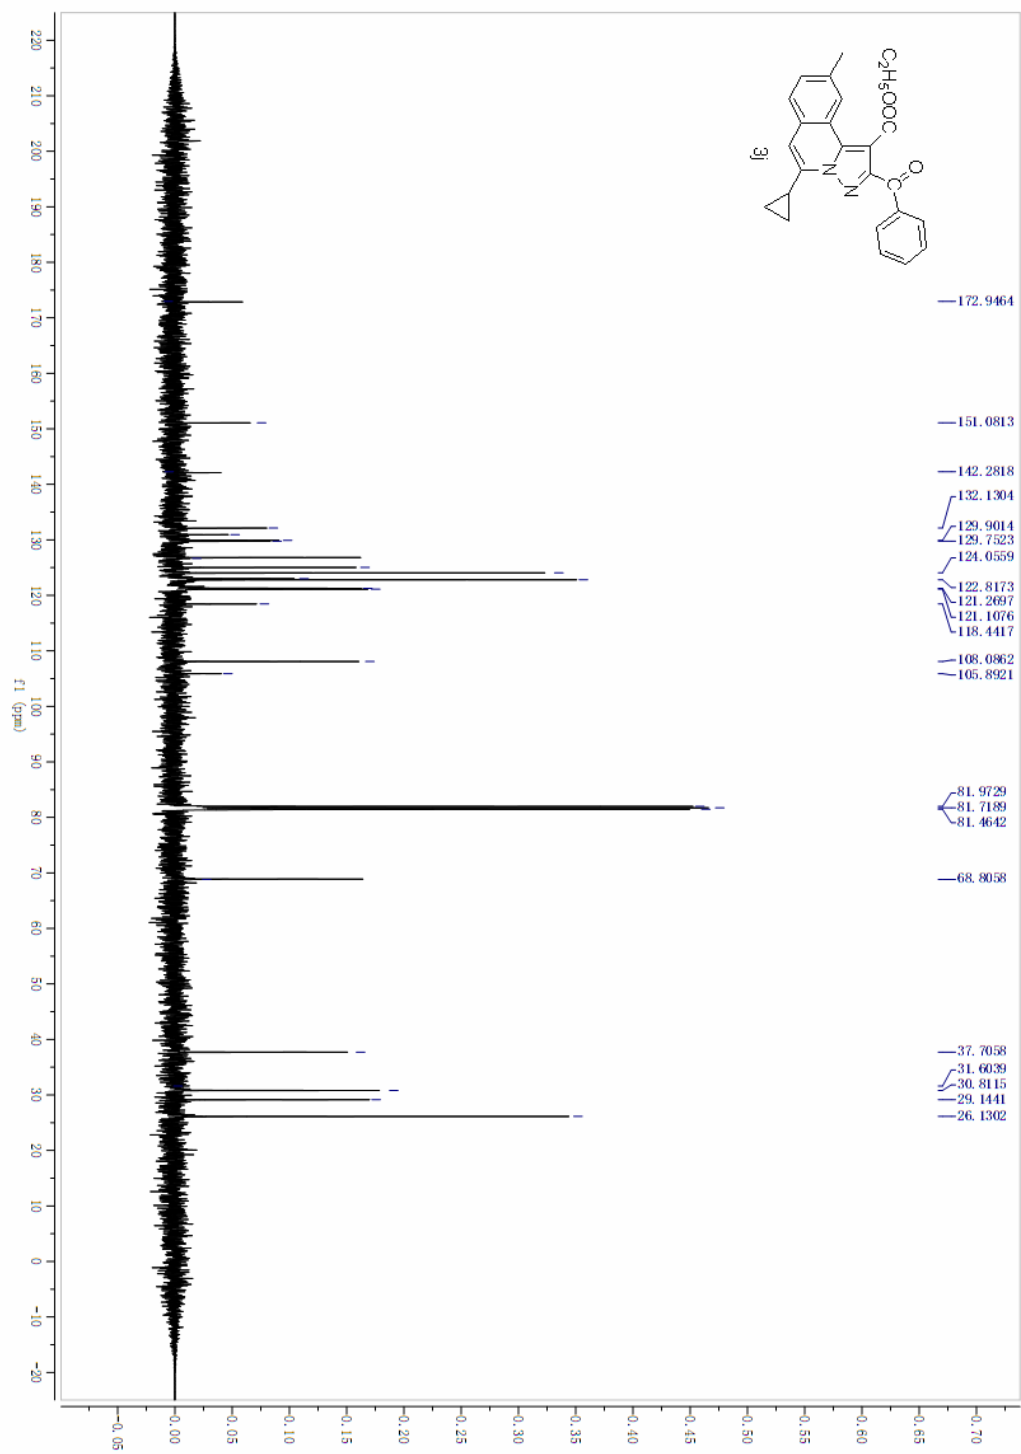

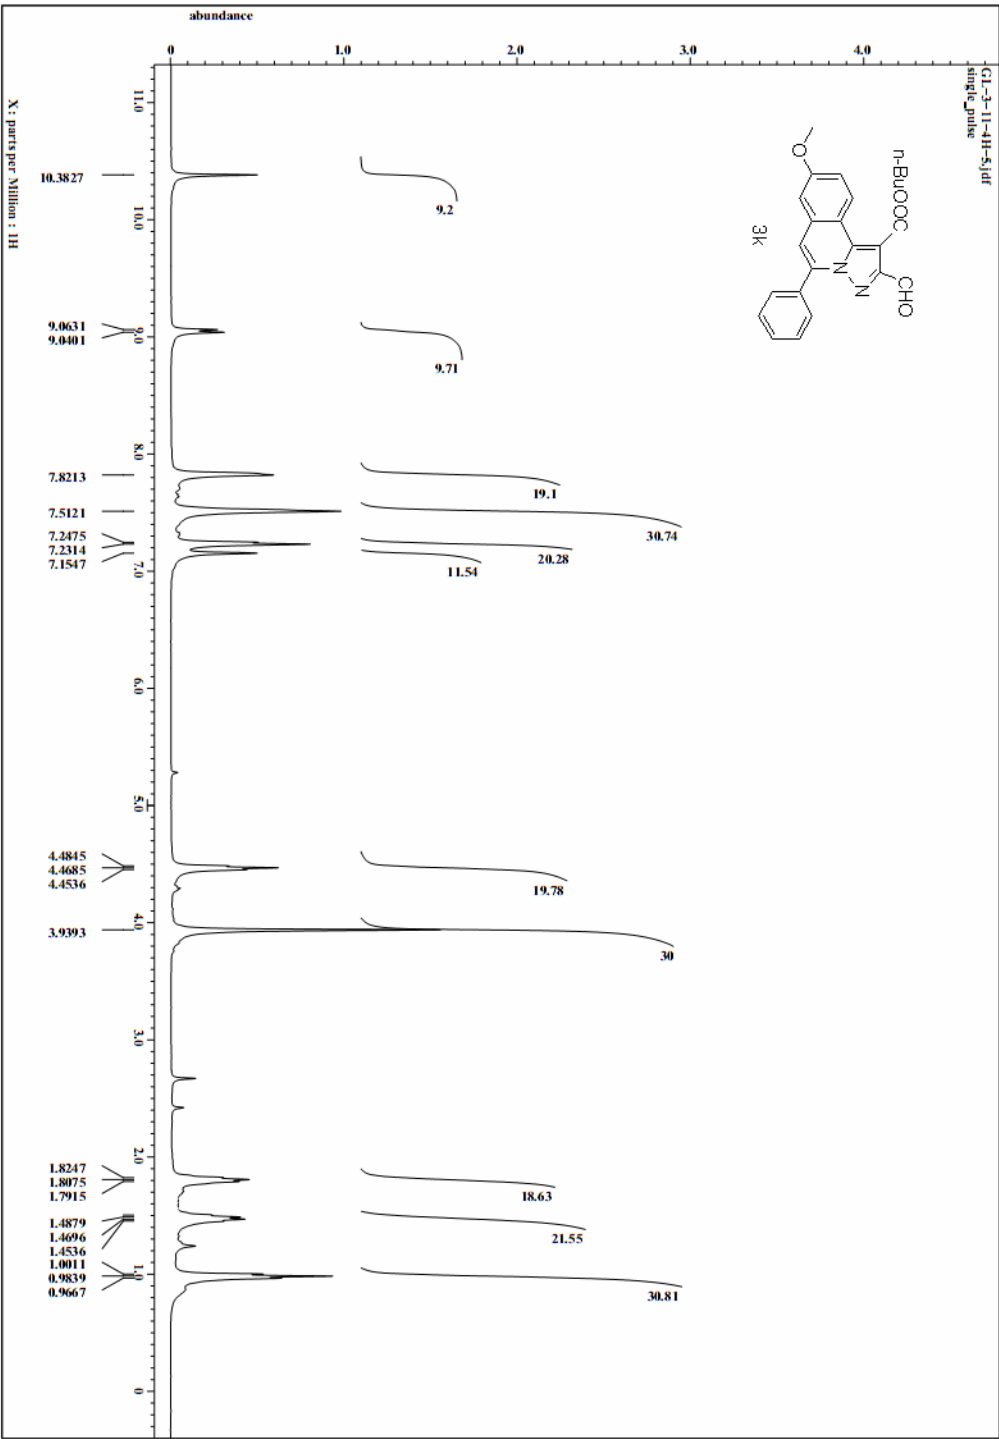

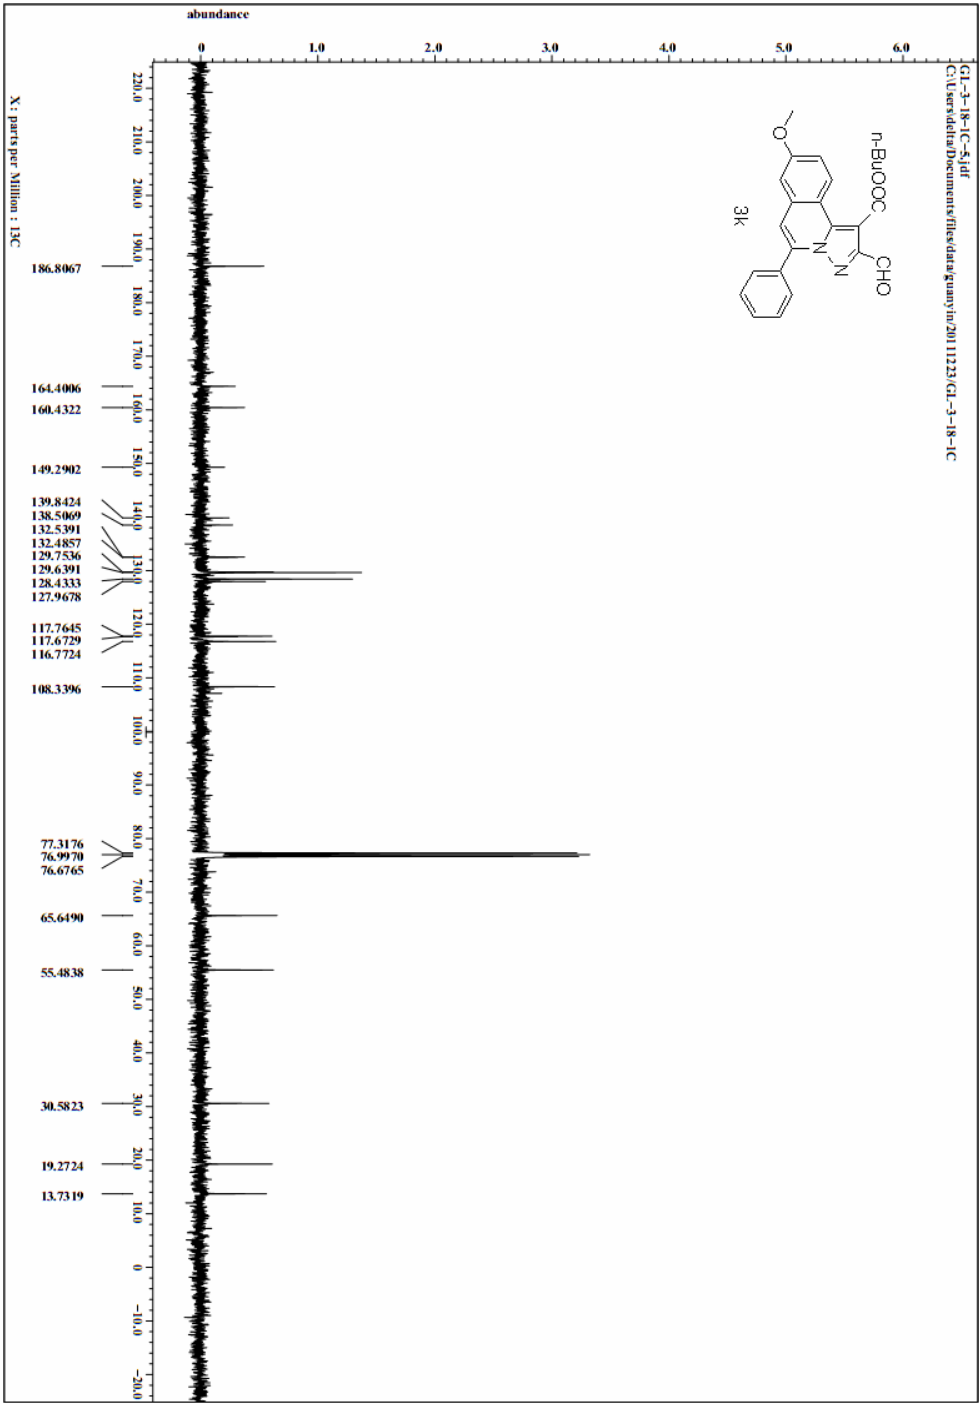

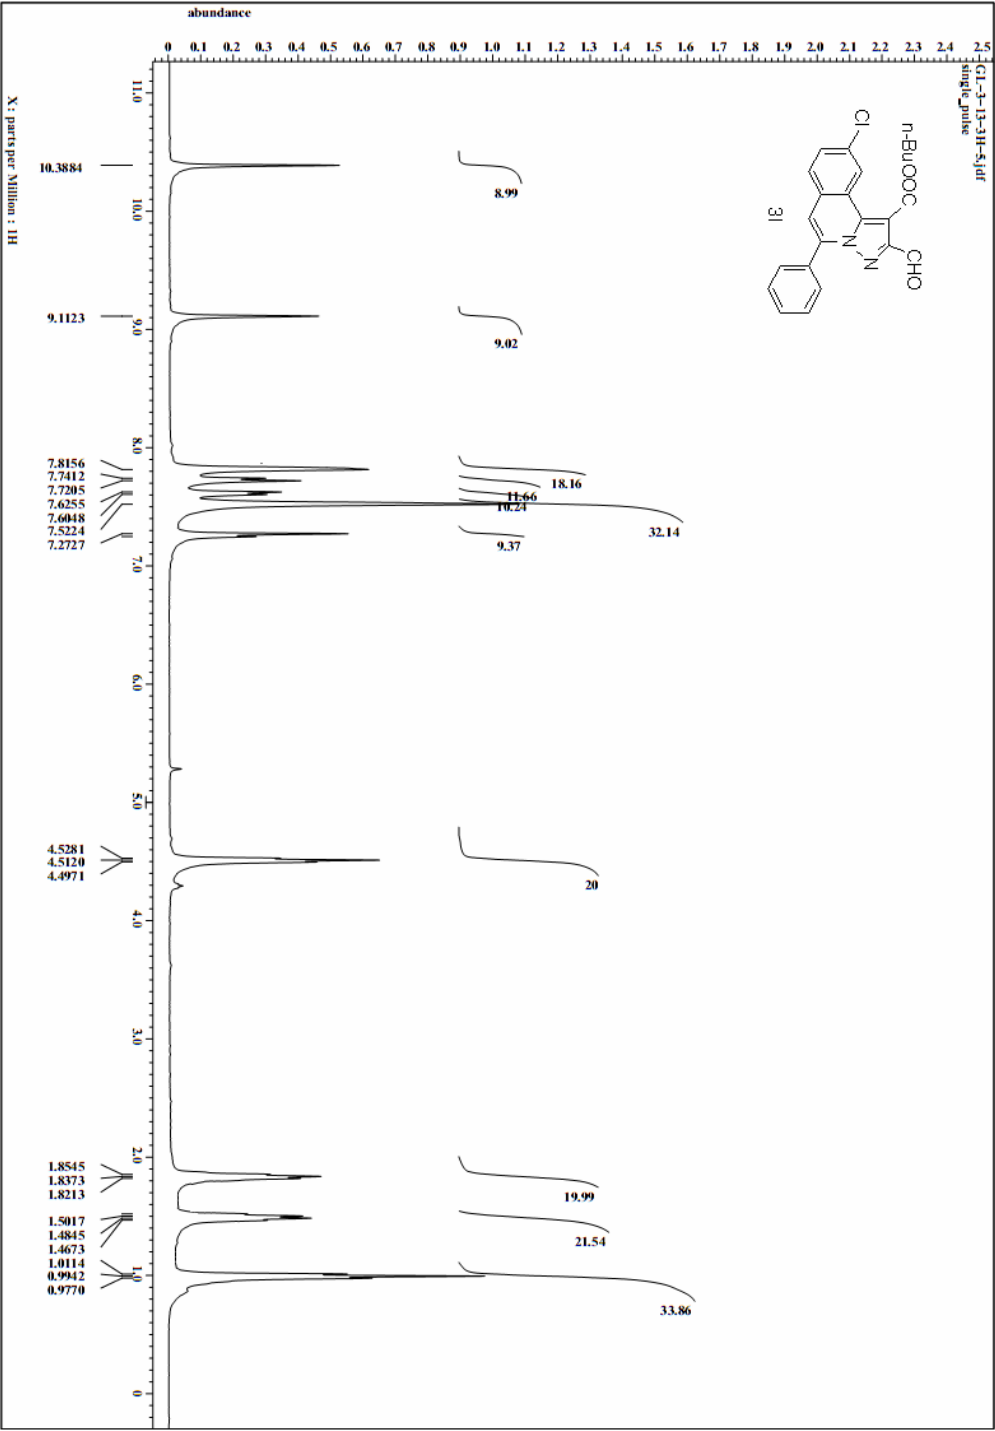



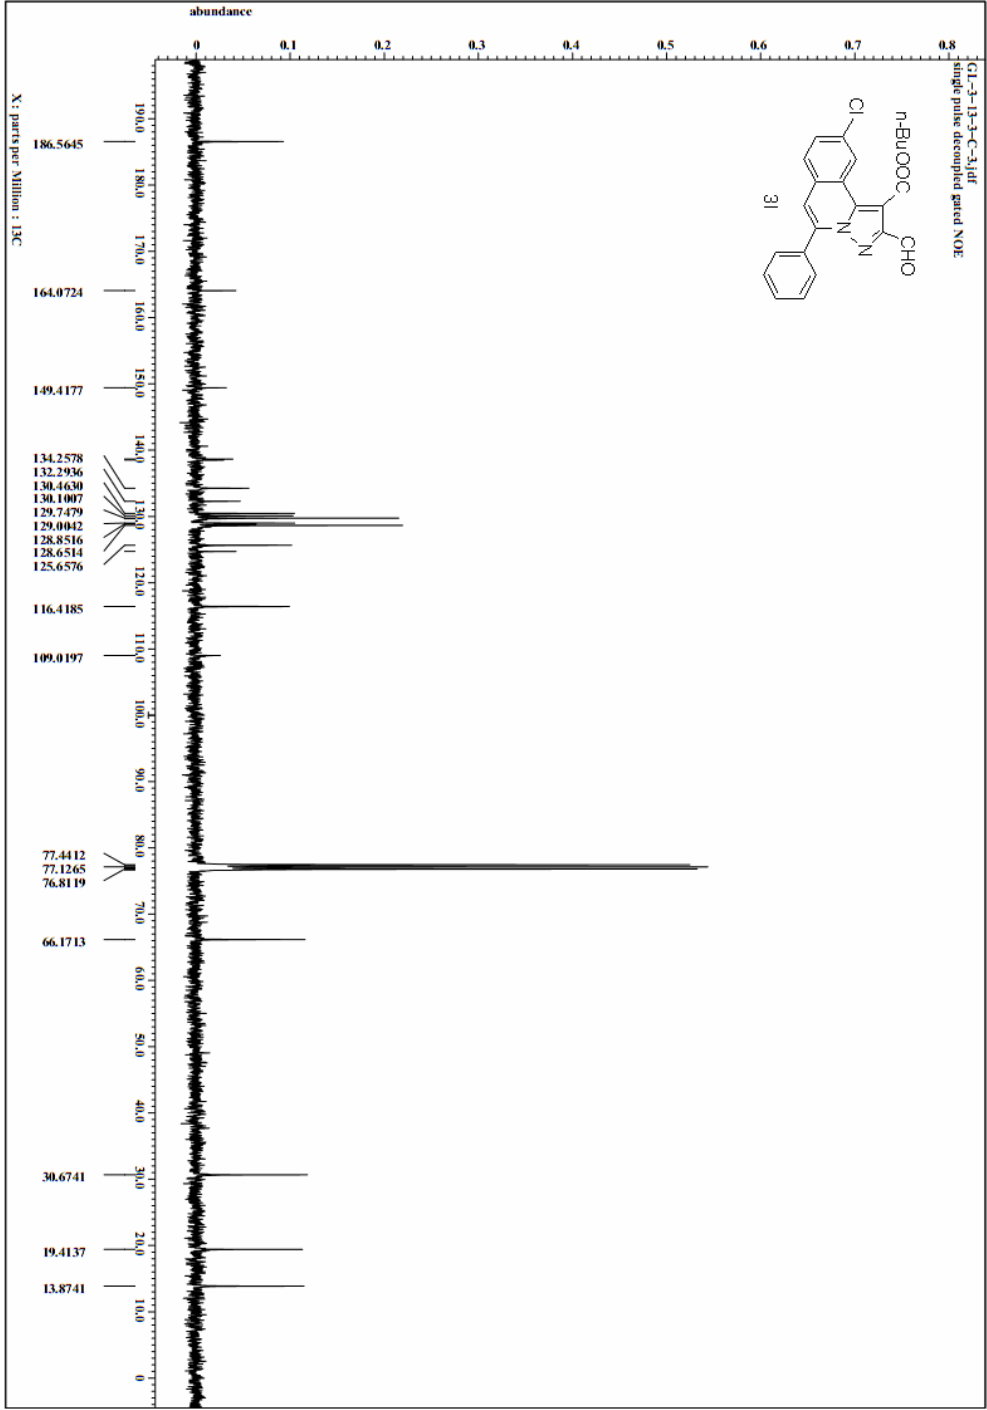

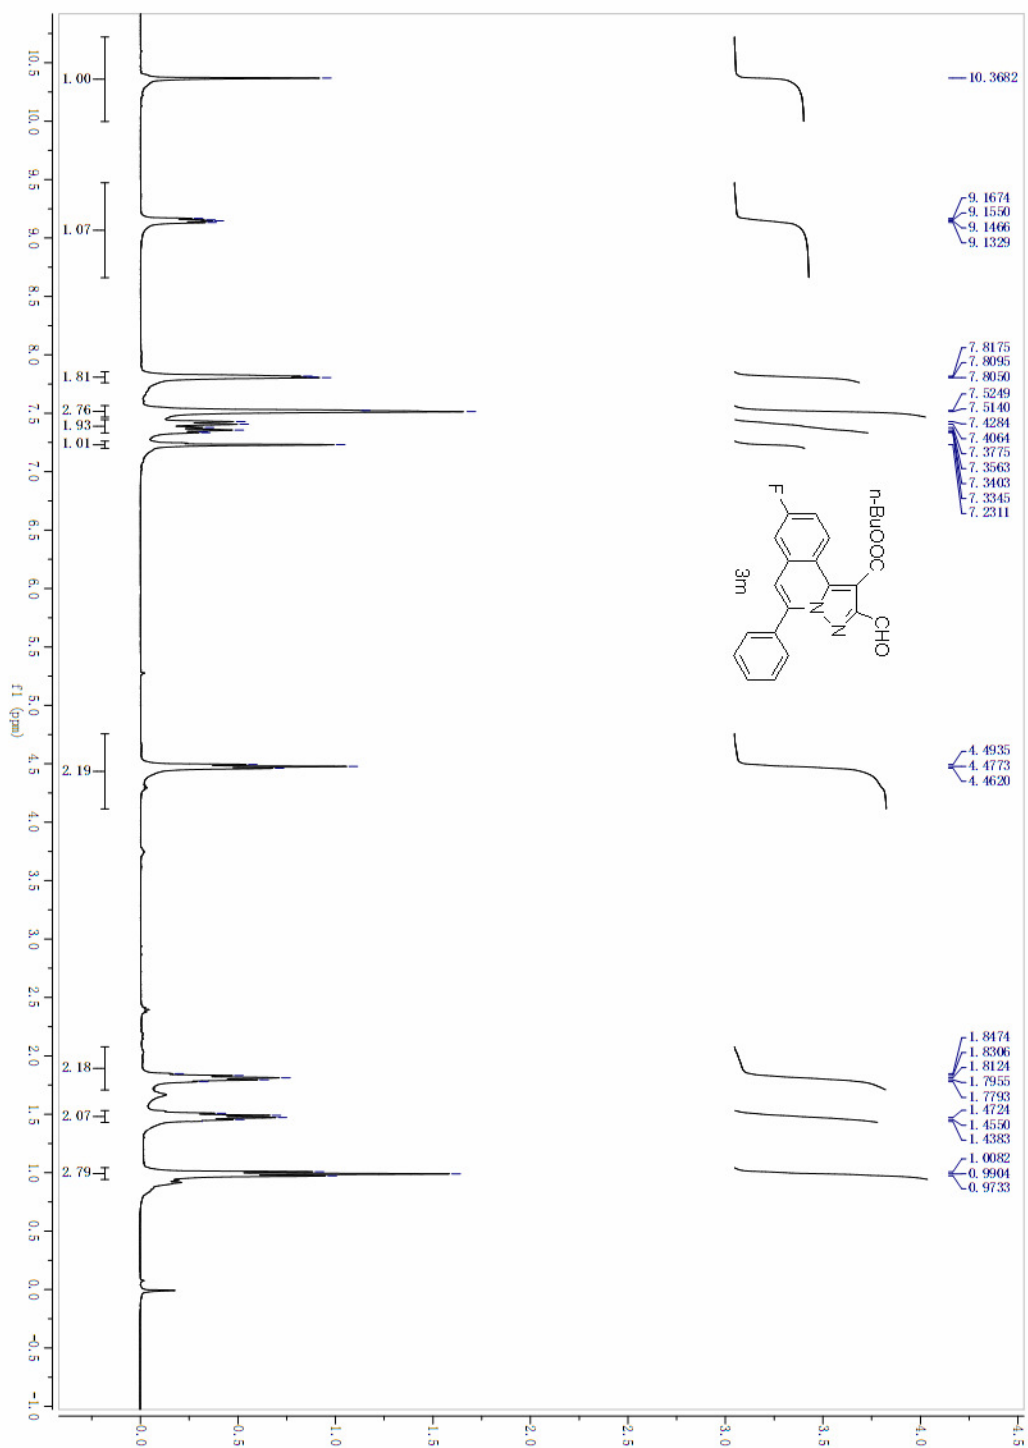

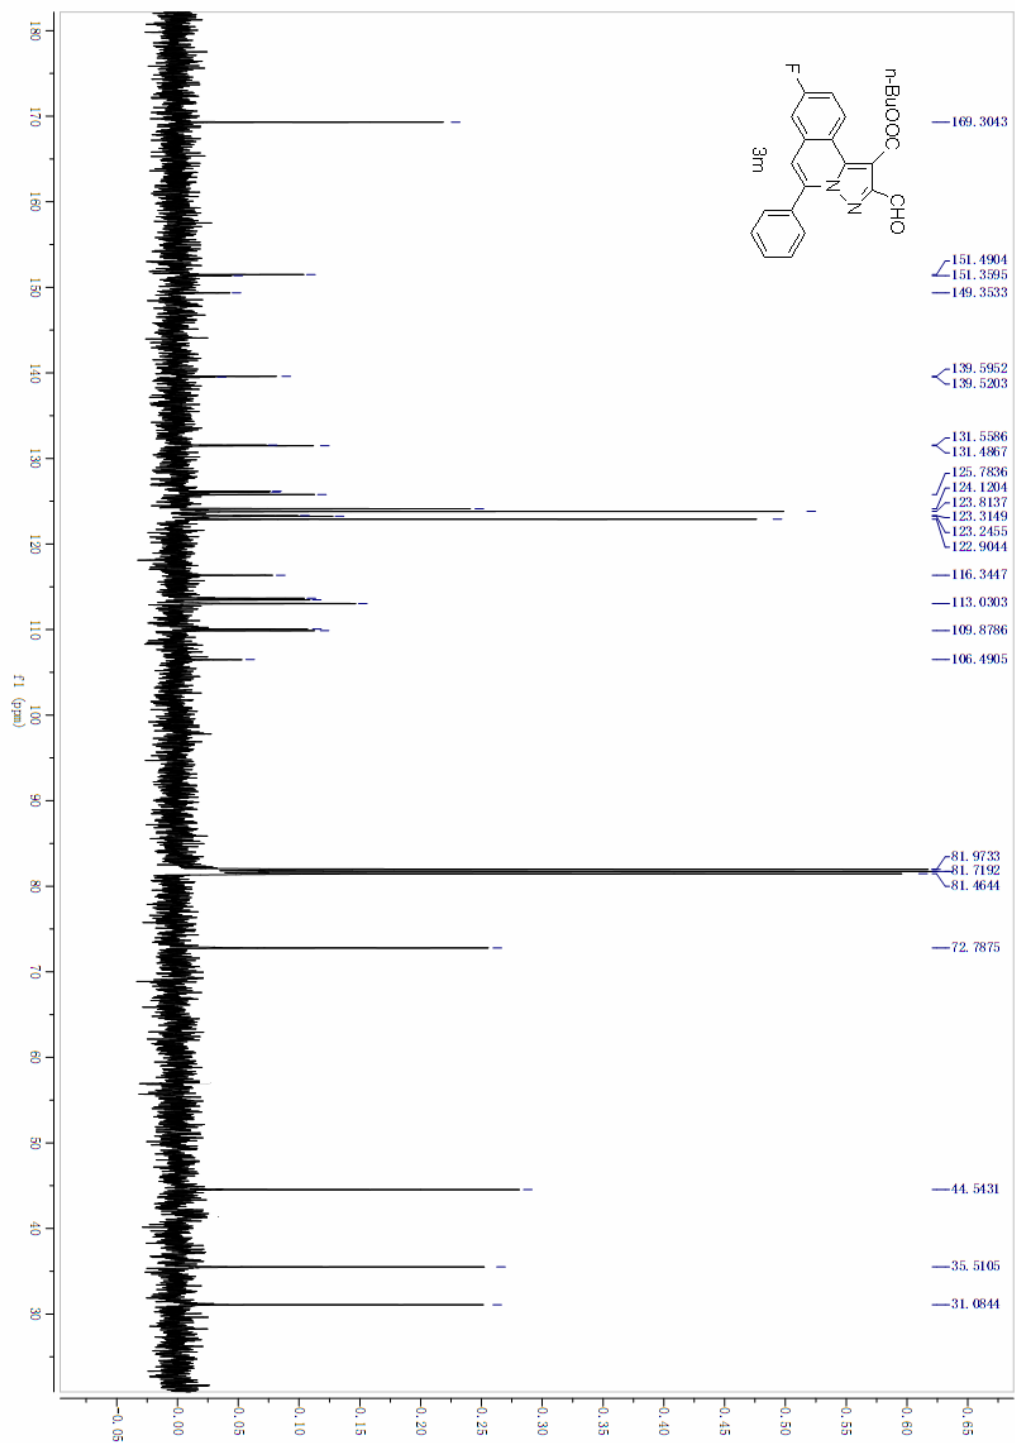

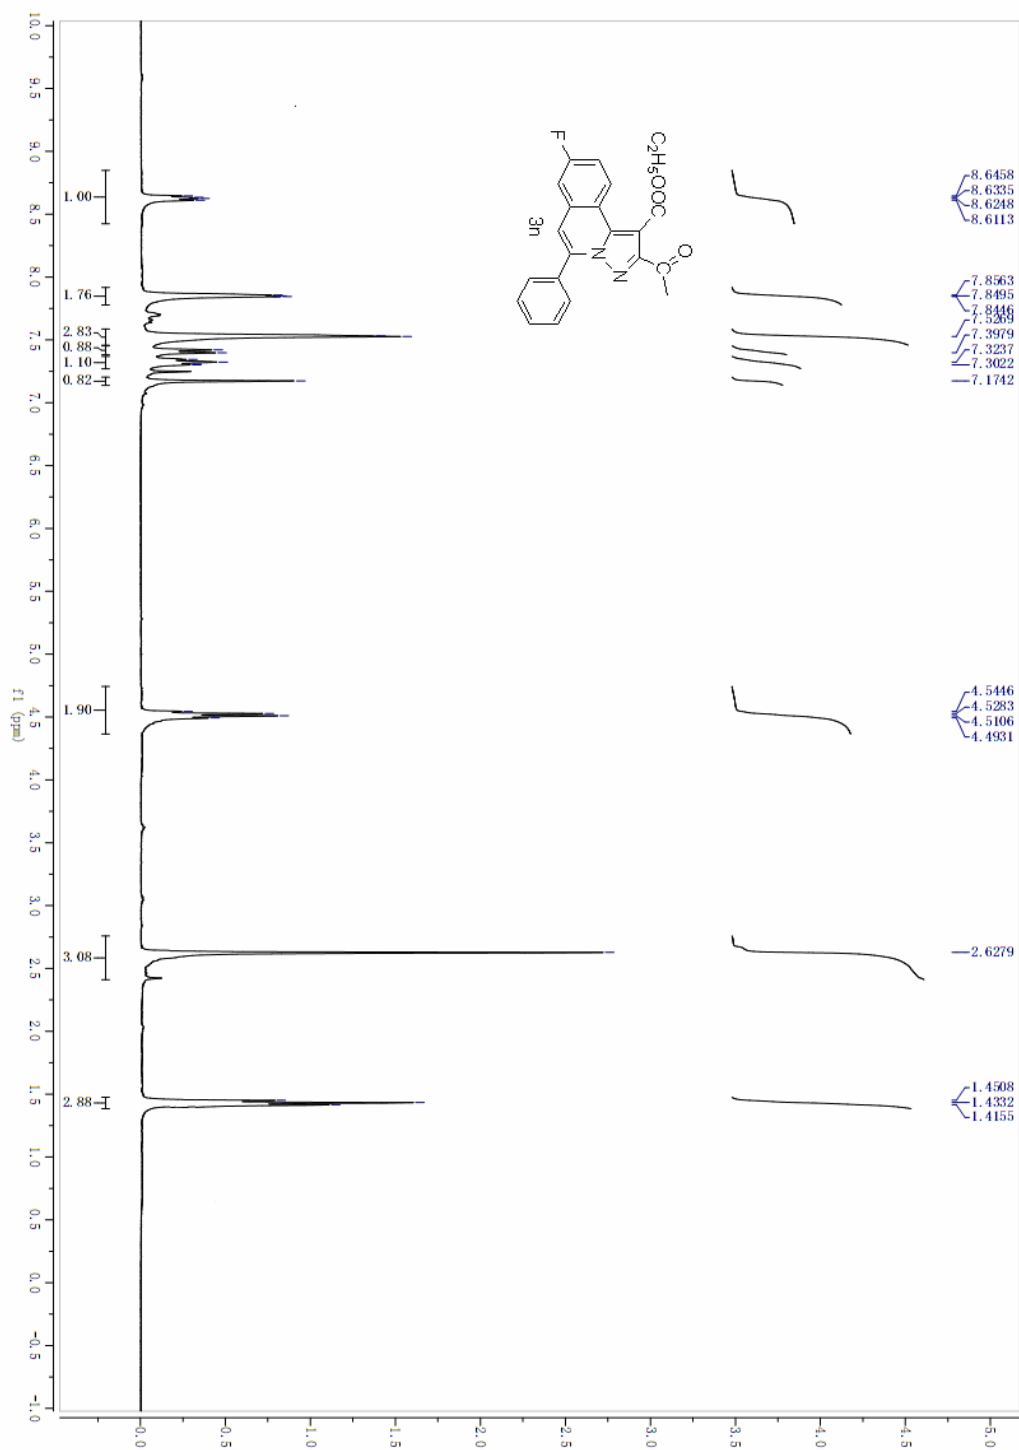

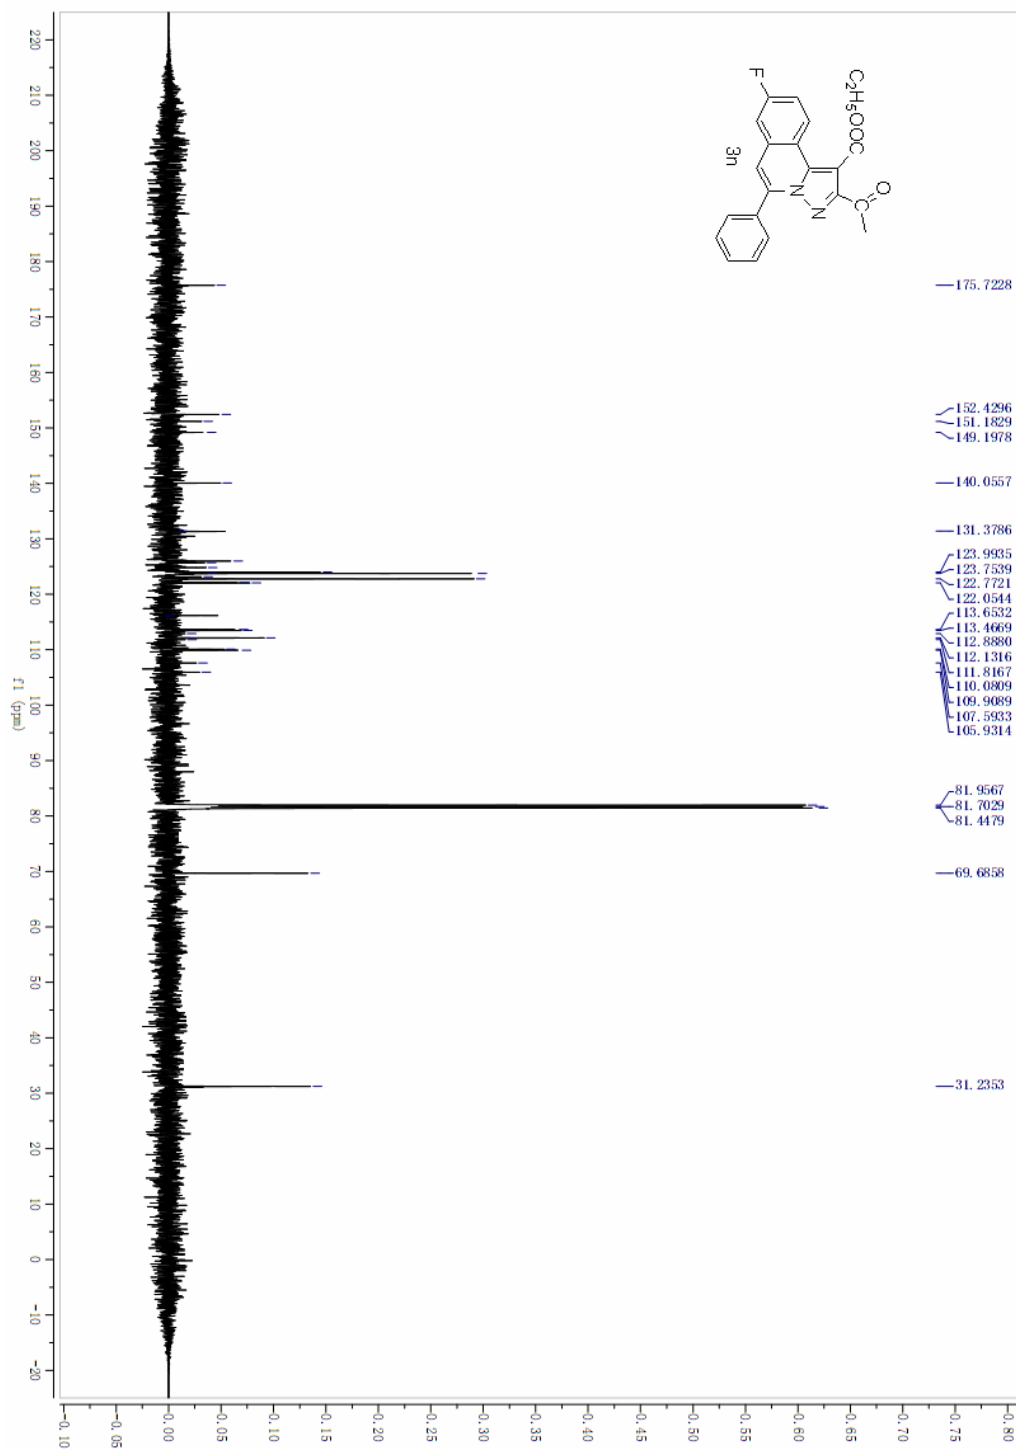

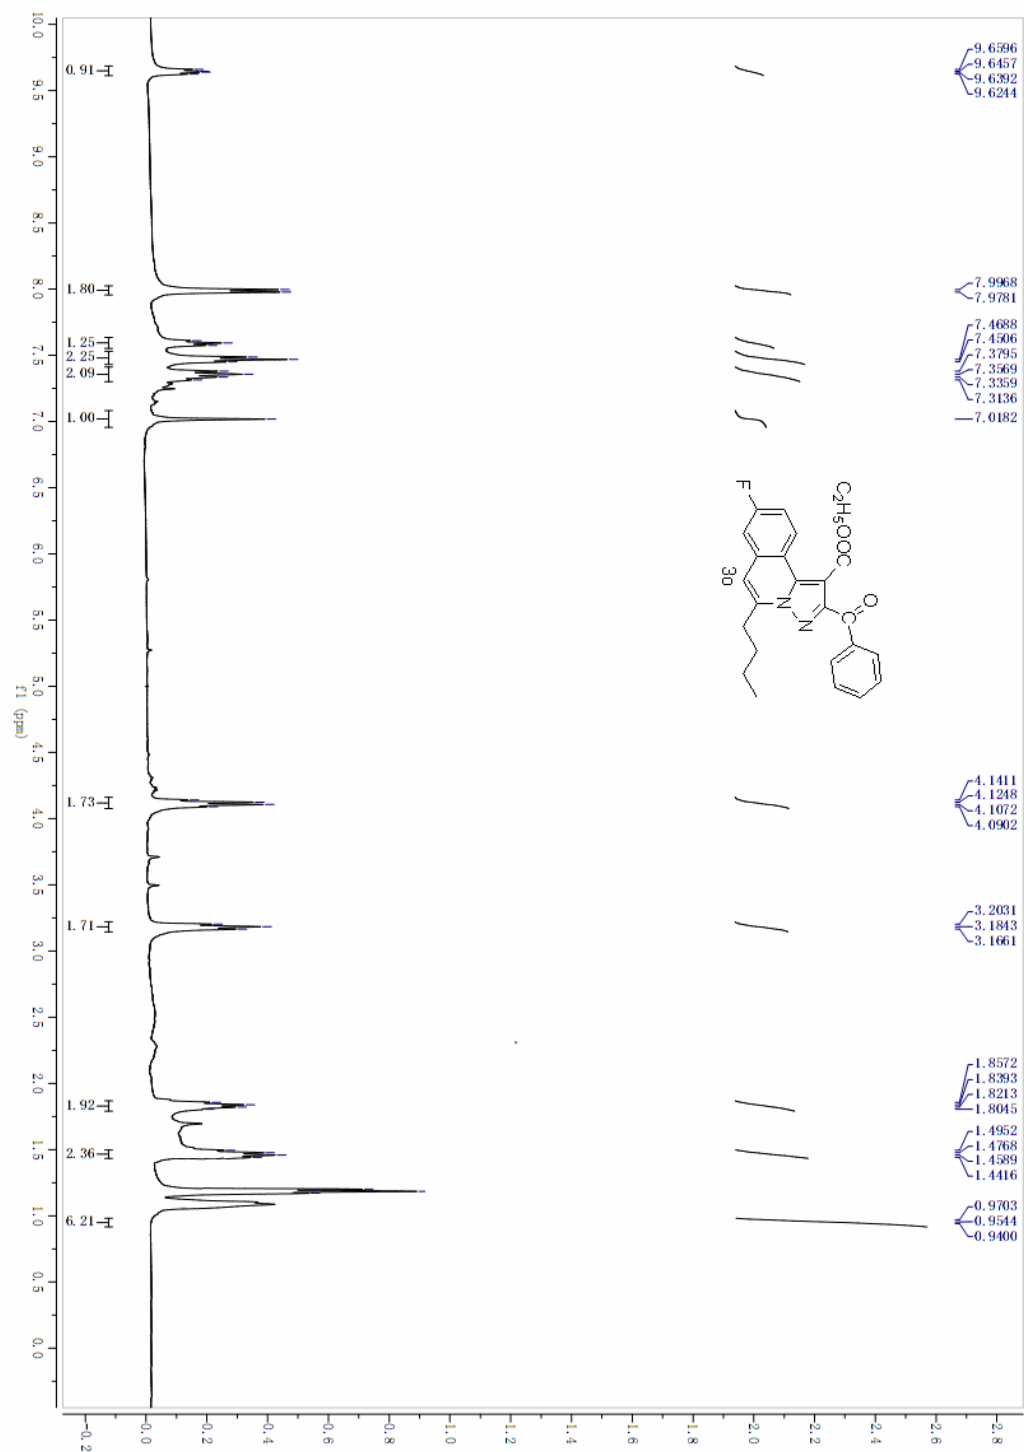

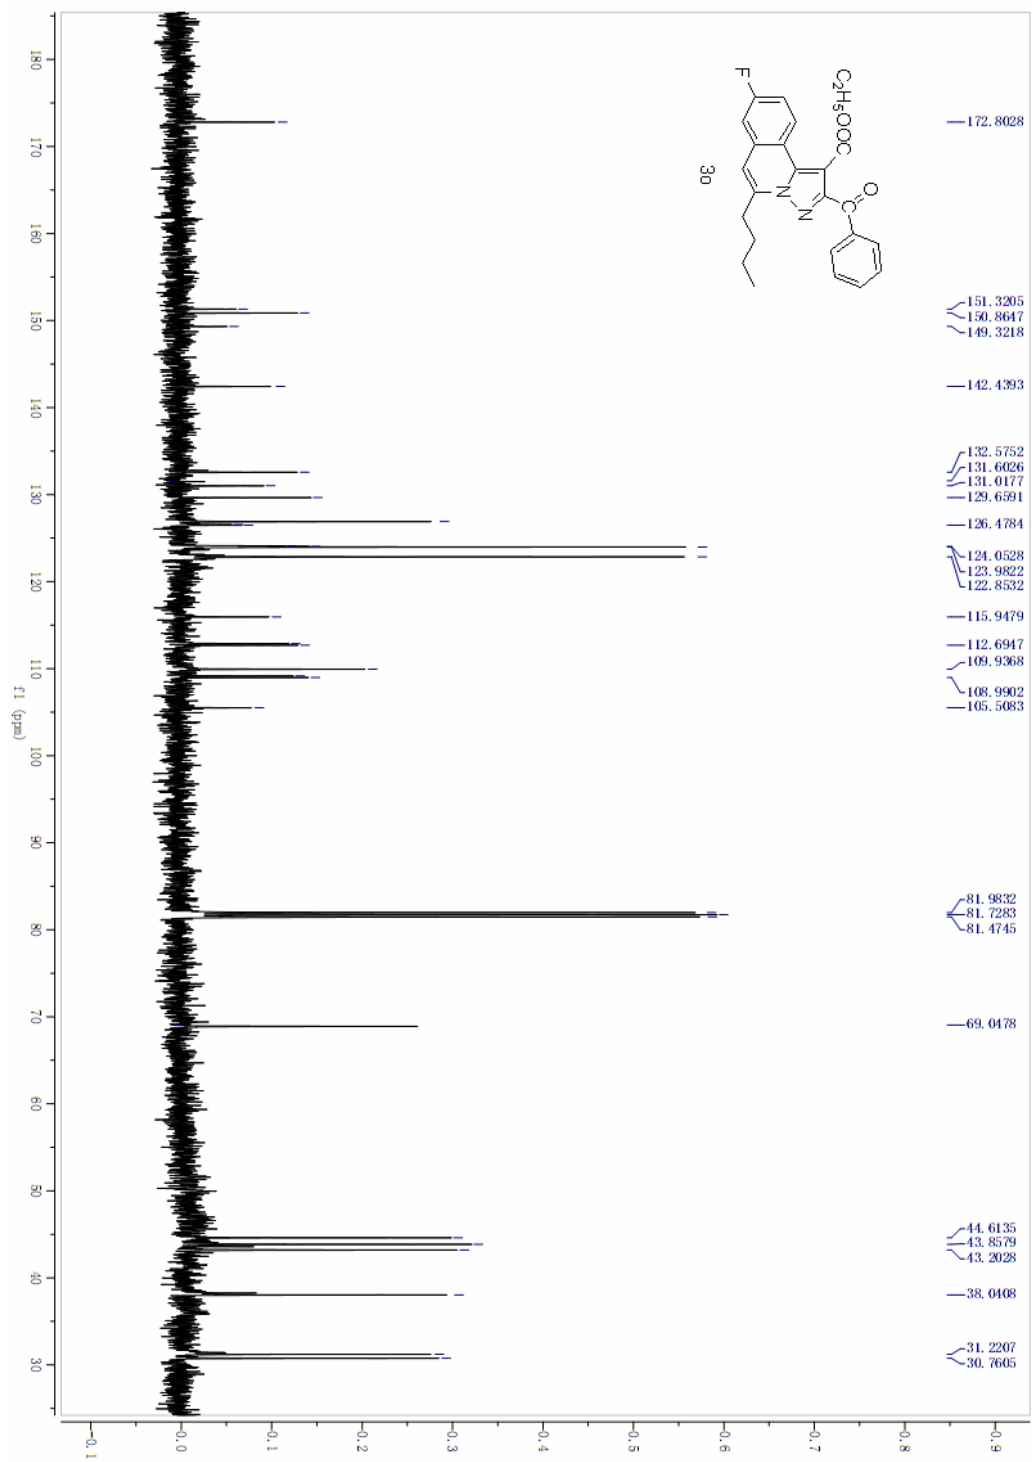

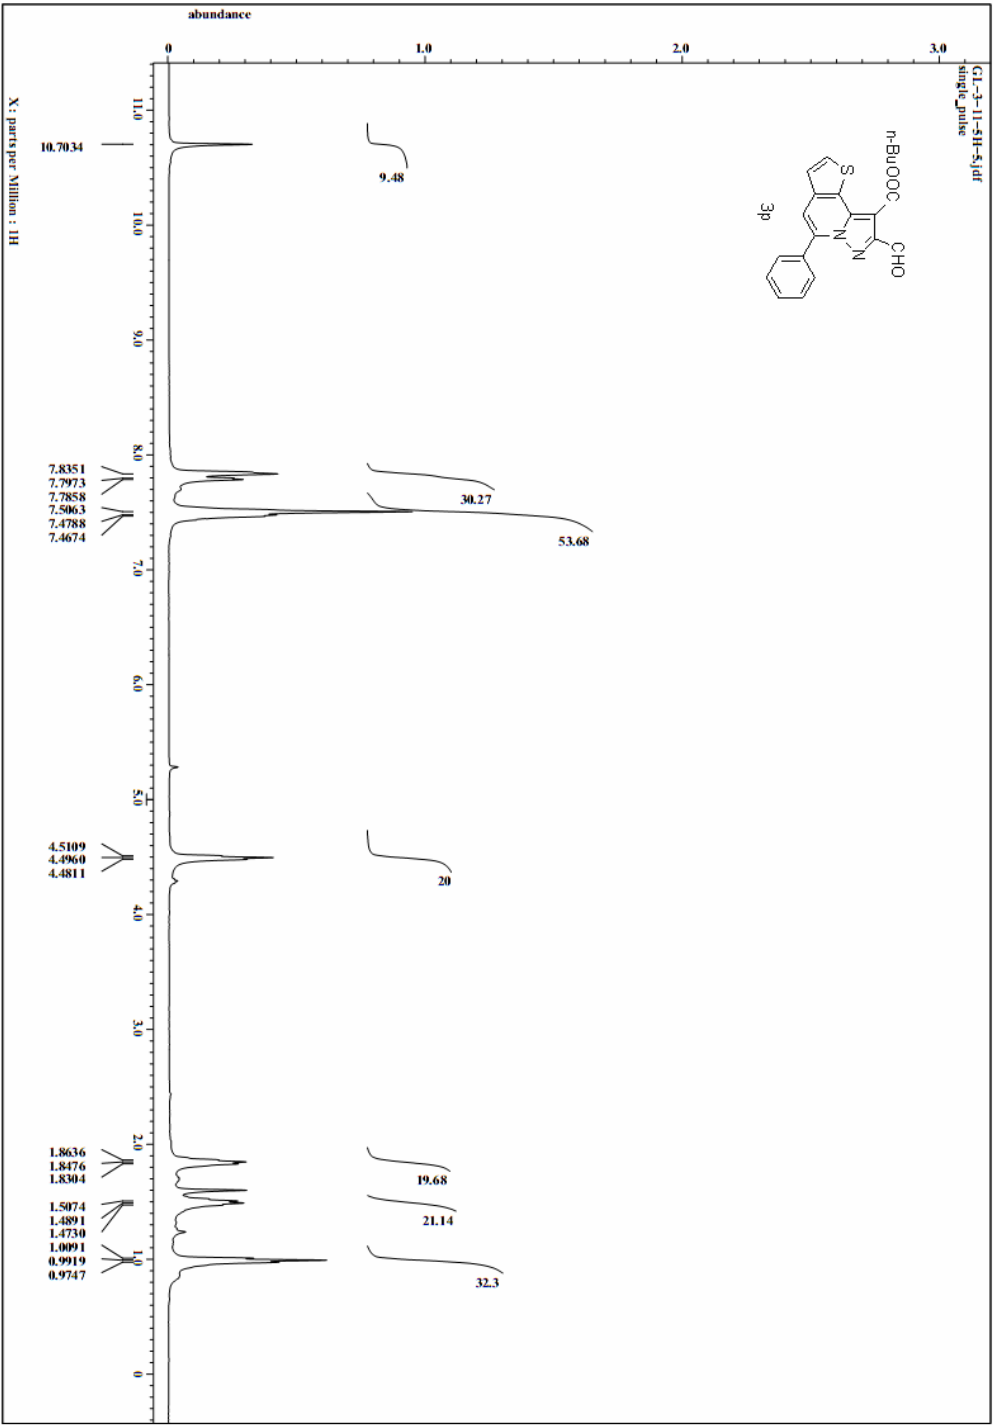



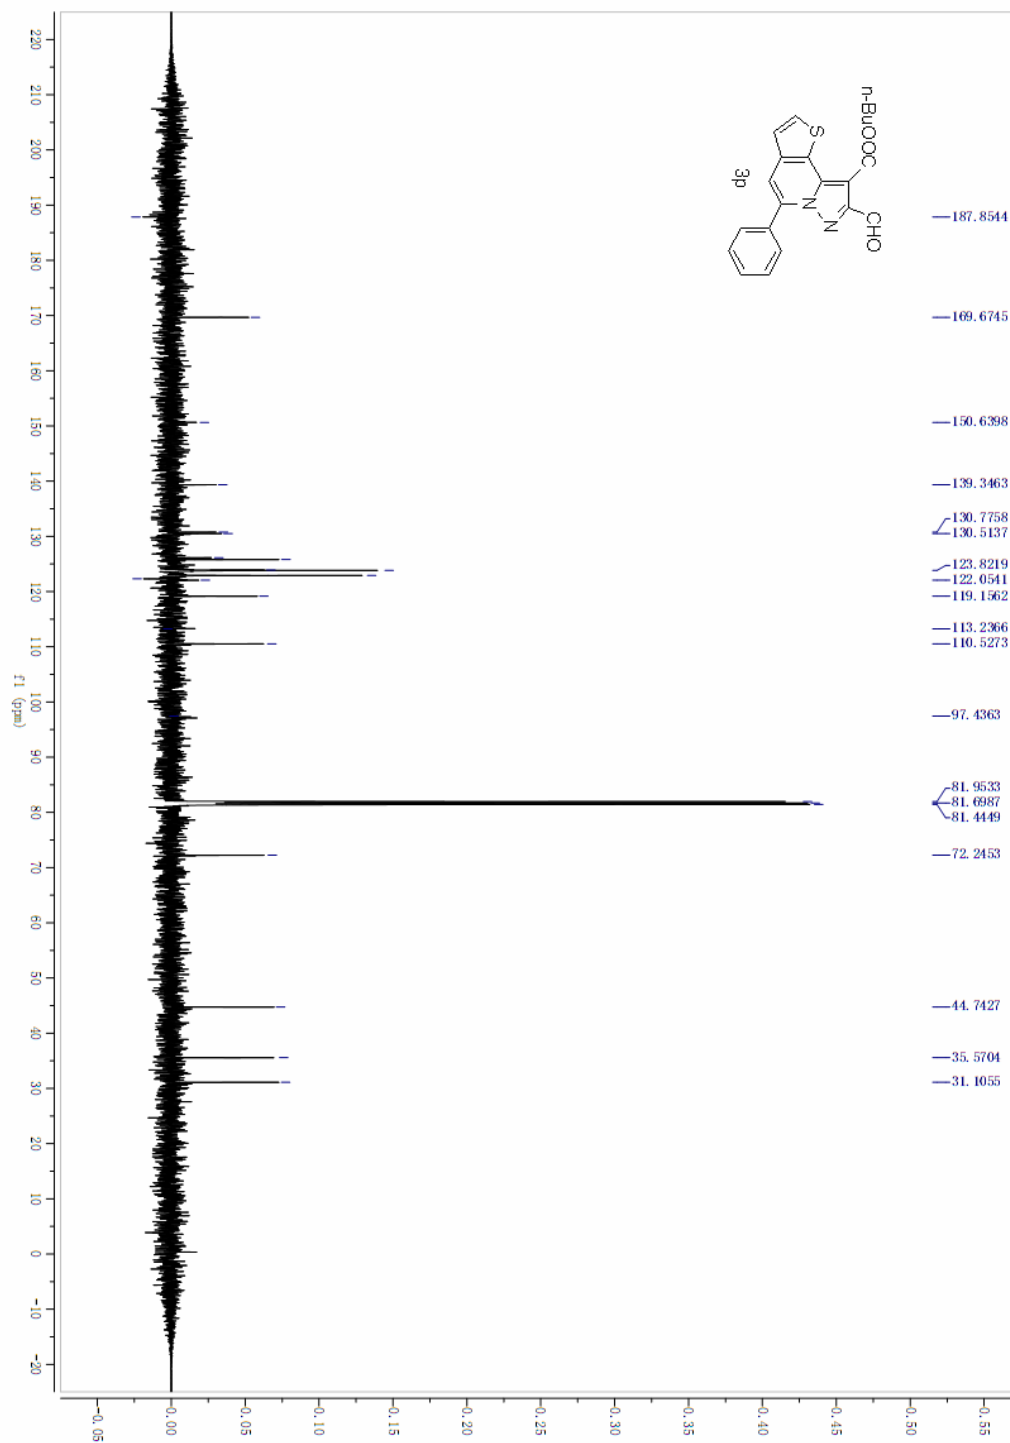

Supplement: c2cc30413a.pdf [file c2cc30413a.pdf]
